# Supplementary material for: Local forest specialists maintain traditional ecological knowledge in the face of environmental threats to Brazilian Amazonian protected areas
Source: Frontiers journal article supplement (doi:10.3389/ffgc.2022.1028129), 2022-11-03
Supplement: Table_1.xlsx [file Table_1.xlsx]

## Sheet: Principal
Protected area	Ethnospecies	Family	Species
Amanã RDS	abacatão	Indet	Indet
Amanã RDS	abacate	Lauraceae	Persea americana
Amanã RDS	abacatirana	Lauraceae	Persea caerulea
Amanã RDS	abiu	Sapotaceae	Pouteria caimito
Amanã RDS	abiurana	Sapotaceae	Indet
Amanã RDS	açaí-Alvarães	Arecaceae	Euterpe precatoria
Amanã RDS	açaí-Codajás	Arecaceae	Euterpe precatoria
Amanã RDS	açaí-solitário	Arecaceae	Euterpe precatoria
Amanã RDS	açaí-touceira	Arecaceae	Euterpe oleracea
Amanã RDS	acapú	Melastomataceae	Mouriri sp.
Amanã RDS	amapá	Indet	Indet
Amanã RDS	andiroba	Meliaceae	Carapa guyanensis
Amanã RDS	angelim	Fabaceae	Indet
Amanã RDS	apuí	Clusiaceae	Clusia sp.
Amanã RDS	araparí	Fabaceae	Macrolobium acaciifolium
Amanã RDS	ararí	Indet	Indet
Amanã RDS	arati	Indet	Indet
Amanã RDS	assacu	Euphorbiaceae	Hura crepitans
Amanã RDS	azeitona	Indet	Indet
Amanã RDS	bacaba	Arecaceae	Oenocarpus bacaba
Amanã RDS	bacabão	Arecaceae	Oenocarpus bacaba
Amanã RDS	bacabinha	Arecaceae	Oenocarpus sp.
Amanã RDS	bacurí	Clusiaceae	Garcinia sp.
Amanã RDS	bacurí-de-anta	Indet	Indet
Amanã RDS	bacurí-igapó	Indet	Indet
Amanã RDS	bacuriaçu	Clusiaceae	Platonia insignis
Amanã RDS	buriti	Arecaceae	Mauritia flexuosa
Amanã RDS	buritirana	Arecaceae	Mauritiella aculeata
Amanã RDS	cacau	Malvaceae	Theobroma cacao
Amanã RDS	cacau-azul	Malvaceae	Theobroma sylvestre
Amanã RDS	cacau-cabeça-de-urubu	Malvaceae	Theobroma obovatum
Amanã RDS	cacau-do-mato	Malvaceae	Theobroma sylvestre
Amanã RDS	cacau-jacaré	Malvaceae	Herrania mariae
Amanã RDS	cacauí	Malvaceae	Theobroma sp.
Amanã RDS	caju	Anacardiaceae	Anacardium occidentale
Amanã RDS	cajuí	Anacardiaceae	Anacardium sp.
Amanã RDS	cajuí-vermelho	Indet	Indet
Amanã RDS	cajurana	Simaroubaceae	Simaba guianensis
Amanã RDS	camu-camu	Myrtaceae	Myrciaria sp.
Amanã RDS	caranaí	Arecaceae	Mauritiella armata
Amanã RDS	carapanaúba	Apocynaceae	Aspidosperma excelsum
Amanã RDS	castanha	Lecythidaceae	Bertholletia excelsa
Amanã RDS	castanha-de-cutia	Indet	Indet
Amanã RDS	castanha-de-rato	Indet	Indet
Amanã RDS	castanharana	Indet	Indet
Amanã RDS	cauxo	Indet	Indet
Amanã RDS	cedro	Meliaceae	Cedrela odorata
Amanã RDS	coco	Arecaceae	Cocos nucifera
Amanã RDS	copaíba	Fabaceae	Copaifera sp.
Amanã RDS	cupiúba	Metteniusaceae	Dendrobangia boliviana
Amanã RDS	cupuaçu	Malvaceae	Theobroma grandiflorum
Amanã RDS	cupuí	Malvaceae	Theobroma subincanum
Amanã RDS	envira	Annonaceae	Indet
Amanã RDS	envira-ferro	Indet	Indet
Amanã RDS	envira-preta	Indet	Indet
Amanã RDS	fava-de-mutum	Indet	Indet
Amanã RDS	garrote	Moraceae	Brosimum utile
Amanã RDS	goiaba	Myrtaceae	Psidium guajava
Amanã RDS	goiaba-de-anta	Melastomataceae	Bellucia grossularioides
Amanã RDS	guariúba	Indet	Indet
Amanã RDS	guaruba	Indet	Indet
Amanã RDS	ingá-do-mato	Fabaceae	Inga sp.
Amanã RDS	itaúba	Lauraceae	Mezilaurus itauba
Amanã RDS	itaubarana	Indet	Indet
Amanã RDS	jacareuba	Calophyllaceae	Calophyllum brasiliense
Amanã RDS	jarina	Arecaceae	Phytelephas macrocarpa
Amanã RDS	jatobá	Fabaceae	Hymenaea sp.
Amanã RDS	jauarí	Arecaceae	Astrocaryum jauari
Amanã RDS	joão-mole	Nyctaginaceae	Guapira venosa
Amanã RDS	jucá	Indet	Indet
Amanã RDS	louro	Lauraceae	Ocotea longifolia
Amanã RDS	louro-abacatirana	Indet	Indet
Amanã RDS	louro-amarelo	Lauraceae	Indet
Amanã RDS	louro-anoirá	Indet	Indet
Amanã RDS	louro-chumbo	Indet	Indet
Amanã RDS	louro-inamuí	Indet	Indet
Amanã RDS	louro-itaúba	Lauraceae	Mezilaurus itauba
Amanã RDS	louro-preto	Indet	Indet
Amanã RDS	macacarecuia	Indet	Indet
Amanã RDS	massaranduba	Sapotaceae	Manilkara huberi
Amanã RDS	macucu	Indet	Indet
Amanã RDS	macucurana	Indet	Indet
Amanã RDS	mamoí	Indet	Indet
Amanã RDS	marupá	Indet	Indet
Amanã RDS	miratoá	Indet	Indet
Amanã RDS	mulateiro	Fabaceae	Peltogyne paniculata
Amanã RDS	mulungu	Indet	Indet
Amanã RDS	muruci	Indet	Indet
Amanã RDS	murumuru	Arecaceae	Astrocaryum murumuru
Amanã RDS	muruxi	Indet	Indet
Amanã RDS	ouricuri	Indet	Indet
Amanã RDS	paracanaúba	Indet	Indet
Amanã RDS	patauá	Arecaceae	Oenocarpus bataua
Amanã RDS	pau-para-tinta	Indet	Indet
Amanã RDS	paxiúba	Arecaceae	Iriartella setigera
Amanã RDS	paxiubão	Arecaceae	Socratea exorrhiza
Amanã RDS	paxiubinha	Malpighiaceae	Byrsonima densa
Amanã RDS	pé-de-jaboti	Annonaceae	Duguetia stenantha
Amanã RDS	piquiá	Caryocaraceae	Caryocar villosum
Amanã RDS	piquiarana	Caryocaraceae	Caryocar pallidum
Amanã RDS	pirum	Indet	Indet
Amanã RDS	punã	Indet	Indet
Amanã RDS	pupunha	Arecaceae	Bactris gasipaes
Amanã RDS	samaúma	Malvaceae	Ceiba pentandra
Amanã RDS	sardinheira	Polygonaceae	Ruprechtia tenuiflora
Amanã RDS	seringa	Euphorbiaceae	Hevea sp.
Amanã RDS	seringa-barriguda	Euphorbiaceae	Hevea spruceana
Amanã RDS	seringa-chicote	Euphorbiaceae	Hevea benthamiana
Amanã RDS	seringa-itaúba	Euphorbiaceae	Hevea guianensis
Amanã RDS	seringaí	Euphorbiaceae	Mabea nitida
Amanã RDS	sorva	Apocynaceae	Couma sp.
Amanã RDS	sucupira	Fabaceae	Andira micrantha
Amanã RDS	tamaquaré	Calophyllaceae	Caraipa sp.
Amanã RDS	tanimbuca	Combretaceae	Buchenavia oxycarpa; Terminalia dichotoma
Amanã RDS	taperebá	Anacardiaceae	Spondias sp.
Amanã RDS	taquari	Euphorbiaceae	Mabea sp.
Amanã RDS	tariri	Picramniaceae	Picramnia ciliata
Amanã RDS	tauarí	Lamiaceae	Vitex triflora
Amanã RDS	tento	Fabaceae	Indet
Amanã RDS	tento-flamengo	Indet	Indet
Amanã RDS	tento-vermelho	Fabaceae	Ormosia stipularis
Amanã RDS	tinteira	Indet	Indet
Amanã RDS	tucumã	Arecaceae	Astrocaryum aculeatum
Amanã RDS	tucumãí	Indet	Indet
Amanã RDS	ubaia	Myrtaceae	Eugenia patrisii
Amanã RDS	ubim	Indet	Indet
Amanã RDS	umari	Indet	Indet
Amanã RDS	unha-de-gato	Rutaceae	Zanthoxylum fagara
Amanã RDS	urucurana	Elaeocarpaceae	Sloanea laurifolia
Amanã RDS	uxi	Humiriaceae	Endopleura uchi
Amanã RDS	virola	Myristicaceae	Virola carinata
Amanã RDS	xixuá	Celastraceae	Maytenus guyanensis
Caxiuanã FLONA	acácia	Indet	Indet
Caxiuanã FLONA	açaí-branco	Arecaceae	Euterpe oleracea
Caxiuanã FLONA	açaí-jussara	Arecaceae	Euterpe edulis
Caxiuanã FLONA	açaí-tinga	Arecaceae	Euterpe oleracea
Caxiuanã FLONA	açaí-touceira	Arecaceae	Euterpe oleracea
Caxiuanã FLONA	acapú	Fabaceae	Vouacapoua americana
Caxiuanã FLONA	acapú	Fabaceae	Vouacapoua americana
Caxiuanã FLONA	acariquara	Olacaceae	Minquartia guianensis
Caxiuanã FLONA	amapá	Moraceae	Brosimum parinarioides
Caxiuanã FLONA	amapá-amargo	Moraceae	Brosimum potabile
Caxiuanã FLONA	ameixa	Myrtaceae	Eugenia cumini
Caxiuanã FLONA	andiroba	Meliaceae	Carapa guyanensis
Caxiuanã FLONA	angelim	Fabaceae	Indet
Caxiuanã FLONA	angelim-fava	Fabaceae	Zygia racemosa
Caxiuanã FLONA	angelim-pedra	Fabaceae	Hymenolobium petraeum
Caxiuanã FLONA	angelim-rajado	Fabaceae	Pithecellobium racemosum
Caxiuanã FLONA	angelim-vermelho	Fabaceae	Dinizia excelsa
Caxiuanã FLONA	apariguariba	Indet	Indet
Caxiuanã FLONA	araracanga	Apocynaceae	Aspidosperma desmanthum
Caxiuanã FLONA	araruta	Indet	Indet
Caxiuanã FLONA	assacu	Indet	Indet
Caxiuanã FLONA	babaçu	Arecaceae	Attalea speciosa
Caxiuanã FLONA	bacaba	Arecaceae	Oenocarpus bacaba
Caxiuanã FLONA	bacabinha	Arecaceae	Oenocarpus sp.
Caxiuanã FLONA	bacurí	Clusiaceae	Platonia insignis
Caxiuanã FLONA	baja	Indet	Indet
Caxiuanã FLONA	barbatimão	Fabaceae	Stryphnodendron adstringens
Caxiuanã FLONA	breu-sucuruba	Burseraceae	Trattinnickia rhoifolia
Caxiuanã FLONA	buçú	Indet	Indet
Caxiuanã FLONA	buiuçu	Fabaceae	Ormosia coutinhoi
Caxiuanã FLONA	buriti	Arecaceae	Mauritia flexuosa
Caxiuanã FLONA	cacau-do-mato	Indet	Indet
Caxiuanã FLONA	caferana	Indet	Indet
Caxiuanã FLONA	caju	Anacardiaceae	Anacardium occidentale
Caxiuanã FLONA	cajuaçu	Anacardiaceae	Anacardium giganteum
Caxiuanã FLONA	cajurana	Simaroubaceae	Simaba guianensis
Caxiuanã FLONA	camurim	Indet	Indet
Caxiuanã FLONA	camuruxi	Indet	Indet
Caxiuanã FLONA	camuti	Indet	Indet
Caxiuanã FLONA	caranã	Arecaceae	Mauritiella armata
Caxiuanã FLONA	carapanaúba	Apocynaceae	Aspidosperma nitidum
Caxiuanã FLONA	cariá	Indet	Indet
Caxiuanã FLONA	carmuxi	Indet	Indet
Caxiuanã FLONA	castanha	Lecythidaceae	Bertholletia excelsa
Caxiuanã FLONA	cedro	Meliaceae	Cedrela odorata
Caxiuanã FLONA	cedro-cheiroso	Indet	Indet
Caxiuanã FLONA	cedrorana	Fabaceae	Cedrelinga cateniformis
Caxiuanã FLONA	ceru	Lecythidaceae	Allantoma lineata
Caxiuanã FLONA	copaíba	Fabaceae	Copaifera sp.
Caxiuanã FLONA	cumaru	Fabaceae	Dipteryx odorata
Caxiuanã FLONA	cumaté	Myrtaceae	Myrcia atramentifera sp.
Caxiuanã FLONA	cumaterana	Indet	Indet
Caxiuanã FLONA	cupiúba	Goupiaceae	Goupia glabra
Caxiuanã FLONA	cupuaçu	Malvaceae	Theobroma grandiflorum
Caxiuanã FLONA	cupuí	Malvaceae	Theobroma subincanum
Caxiuanã FLONA	curuá	Arecaceae	Attalea spectabilis
Caxiuanã FLONA	cutiriba	Indet	Indet
Caxiuanã FLONA	dendê	Arecaceae	Indet
Caxiuanã FLONA	embaúba	Urticaceae	Pourouma villosa
Caxiuanã FLONA	esponja	Fabaceae	Parkia ulei
Caxiuanã FLONA	fava-amargosa	Fabaceae	Vatairea paraensis
Caxiuanã FLONA	frejó	Boraginaceae	Cordia goeldiana
Caxiuanã FLONA	fruta-da-beira	Indet	Indet
Caxiuanã FLONA	gameleira	Moraceae	Ficus maxima
Caxiuanã FLONA	guaruba	Indet	Indet
Caxiuanã FLONA	guaruba-goiaba	Indet	Indet
Caxiuanã FLONA	guaruba-tinga	Indet	Indet
Caxiuanã FLONA	guaruba-vermelha	Indet	Indet
Caxiuanã FLONA	inajá	Arecaceae	Maximiliana maripa
Caxiuanã FLONA	ingá-xixica	Fabaceae	Inga sp.
Caxiuanã FLONA	pau-darco-amarelo	Bignoniaceae	Tabebuia serratifolia
Caxiuanã FLONA	pau-darco-de-pobre	Indet	Indet
Caxiuanã FLONA	pau-darco-rosa	Indet	Indet
Caxiuanã FLONA	pau-darco-roxo	Indet	Indet
Caxiuanã FLONA	itaúba	Lauraceae	Mezilaurus itauba
Caxiuanã FLONA	itaúba-amarela	Lauraceae	Mezilaurus itauba
Caxiuanã FLONA	itaúba-preta	Lauraceae	Ocotea splendens
Caxiuanã FLONA	jabutirana	Indet	Indet
Caxiuanã FLONA	jacitara	Arecaceae	Desmoncus sp.
Caxiuanã FLONA	janduba	Fabaceae	Inga sp.
Caxiuanã FLONA	jará	Arecaceae	Indet
Caxiuanã FLONA	jará-abil	Indet	Indet
Caxiuanã FLONA	jatobá	Fabaceae	Hymenaea courbaril
Caxiuanã FLONA	jenipapo	Rubiaceae	Genipa americana
Caxiuanã FLONA	junduuba	Indet	Indet
Caxiuanã FLONA	jururu	Indet	Indet
Caxiuanã FLONA	jutaí	Fabaceae	Dialium guianense
Caxiuanã FLONA	louro	Lauraceae	Aniba affinis
Caxiuanã FLONA	louro-faia	Proteaceae	Euplassa pinnata
Caxiuanã FLONA	louro-vermelho	Lauraceae	Ocotea rubra
Caxiuanã FLONA	macacaúba	Fabaceae	Platymiscium sp.
Caxiuanã FLONA	massaranduba	Sapotaceae	Manilkara huberi
Caxiuanã FLONA	mamão	Indet	Indet
Caxiuanã FLONA	mamorana	Malvaceae	Bombax longipedicellatum; Pachira aquatica
Caxiuanã FLONA	mandioqueiro	Vochysiaceae	Qualea albiflora
Caxiuanã FLONA	manga	Anacardiaceae	Mangifera indica
Caxiuanã FLONA	maparajuba	Anacardiaceae	Mangifera indica
Caxiuanã FLONA	maracatiara	Anacardiaceae	Astronium lecointei
Caxiuanã FLONA	marapuama	Olacaceae	Ptychopetalum olacoides
Caxiuanã FLONA	marupá	Simaroubaceae	Simarouba amara
Caxiuanã FLONA	matamatá	Lecythidaceae	Eschweilera sp.
Caxiuanã FLONA	meraúba	Melastomataceae	Mouriri acutiflora
Caxiuanã FLONA	mogno	Meliaceae	Swietenia macrophylla
Caxiuanã FLONA	molongó	Apocynaceae	Malouetia tamaquarina
Caxiuanã FLONA	morototó	Araliaceae	Schefflera morototoni
Caxiuanã FLONA	morrão	Indet	Indet
Caxiuanã FLONA	mucajá	Arecaceae	Acrocomia aculeata
Caxiuanã FLONA	muruci	Indet	Indet
Caxiuanã FLONA	mururé	Moraceae	Pseudolmedia laevigata
Caxiuanã FLONA	muuba	Indet	Indet
Caxiuanã FLONA	palha-preta	Indet	Indet
Caxiuanã FLONA	para-para	Bignoniaceae	Jacaranda copaia
Caxiuanã FLONA	paruru	Humiriaceae	Vantanea sp.
Caxiuanã FLONA	patauá	Arecaceae	Oenocarpus bataua
Caxiuanã FLONA	pau-amarelo	Rutaceae	Euxylophora paraensis
Caxiuanã FLONA	pau-de-mastro	Indet	Indet
Caxiuanã FLONA	pau-japu	Indet	Indet
Caxiuanã FLONA	pau-para-tudo	Simaroubaceae	Simaba cedron
Caxiuanã FLONA	pau-pereira	Indet	Indet
Caxiuanã FLONA	piquiá	Caryocaraceae	Caryocar villosum
Caxiuanã FLONA	piquiarana	Caryocaraceae	Caryocar glabrum; Caryocar microcarpum
Caxiuanã FLONA	pitaíca	Fabaceae	Swartzia sp.
Caxiuanã FLONA	pitomba	Indet	Indet
Caxiuanã FLONA	pracaxi	Fabaceae	Pentaclethra macroloba
Caxiuanã FLONA	pupunha	Arecaceae	Bactris gasipaes
Caxiuanã FLONA	pupunharana	Arecaceae	Syagrus inajai
Caxiuanã FLONA	quina	Apocynaceae	Aspidosperma sp.
Caxiuanã FLONA	roxinho	Fabaceae	Peltogyne maranhensis
Caxiuanã FLONA	samaúma	Malvaceae	Ceiba pentandra
Caxiuanã FLONA	sapucaia	Lecythidaceae	Lecythis pisonis
Caxiuanã FLONA	sorva	Apocynaceae	Couma guianensis; Couma macrocarpa
Caxiuanã FLONA	sucupira	Fabaceae	Indet
Caxiuanã FLONA	sucupira-amarela	Fabaceae	Enterolobium schomburgkii
Caxiuanã FLONA	sucupira-preta	Fabaceae	Diplotropis purpurea
Caxiuanã FLONA	sucupira-vargem	Indet	Indet
Caxiuanã FLONA	sucuuba	Apocynaceae	Himatanthus sucuuba; Himatanthus articulatus
Caxiuanã FLONA	taperebá	Anacardiaceae	Spondias mombin
Caxiuanã FLONA	taperebarana	Indet	Indet
Caxiuanã FLONA	taquarirana	Indet	Indet
Caxiuanã FLONA	tatajuba	Moraceae	Bagassa guianensis
Caxiuanã FLONA	tauarí	Lecythidaceae	Couratari sp.
Caxiuanã FLONA	tinteira	Melastomataceae	Miconia cf. chrysophylla
Caxiuanã FLONA	tucumã	Arecaceae	Astrocaryum aculeatum
Caxiuanã FLONA	tucumã-açu	Arecaceae	Astrocaryum aculeatum
Caxiuanã FLONA	tucumã-piranga	Indet	Indet
Caxiuanã FLONA	tucumãí	Indet	Indet
Caxiuanã FLONA	ubim	Arecaceae	Geonoma maxima
Caxiuanã FLONA	umari	Metteniusaceae	Poraqueiba paraensis
Caxiuanã FLONA	uxi	Humiriaceae	Endopleura uchi
Caxiuanã FLONA	verônica	Indet	Indet
Caxiuanã FLONA	virola	Myristicaceae	Virola sp.
Humaitá FLONA	abiu	Sapotaceae	Pouteria caimito
Humaitá FLONA	abiurana	Sapotaceae	Pradosia surinamensis
Humaitá FLONA	abota	Menispermaceae	Abuta sp.
Humaitá FLONA	açaí-solitário	Arecaceae	Euterpe precatoria
Humaitá FLONA	acariquara	Olacaceae	Minquartia guianensis
Humaitá FLONA	amapá	Moraceae	Pseudolmedia macrophylla
Humaitá FLONA	amapá-grande	Moraceae	Pseudolmedia macrophylla
Humaitá FLONA	amapá-pequeno	Moraceae	Brosimum sp.
Humaitá FLONA	ananí	Clusiaceae	Garcinia sp.
Humaitá FLONA	andiroba	Meliaceae	Carapa procera
Humaitá FLONA	angelim	Fabaceae	Hymenolobium modestum
Humaitá FLONA	apuna	Myristicaceae	Iryanthera sp.
Humaitá FLONA	araçá	Indet	Indet
Humaitá FLONA	arapuama	Indet	Indet
Humaitá FLONA	assacu	Euphorbiaceae	Hura crepitans
Humaitá FLONA	azeitona	Chrysobalanaceae	Licania egleri
Humaitá FLONA	babaçu	Arecaceae	Attalea speciosa
Humaitá FLONA	bacaba	Arecaceae	Oenocarpus bacaba
Humaitá FLONA	bacabinha	Arecaceae	Oenocarpus minor
Humaitá FLONA	bacurí	Clusiaceae	Garcinia macrophylla
Humaitá FLONA	balata	Sapotaceae	Manilkara sp.
Humaitá FLONA	balatarana	Sapotaceae	Pouteria rostrata
Humaitá FLONA	biribá-do-mato	Annonaceae	Annona cuspidata
Humaitá FLONA	breu-branco	Burseraceae	Protium sp.
Humaitá FLONA	buriti	Arecaceae	Mauritia flexuosa
Humaitá FLONA	cacau-do-mato	Malvaceae	Theobroma speciosum
Humaitá FLONA	cacau-jacaré	Malvaceae	Theobroma sylvestre
Humaitá FLONA	caioé	Arecaceae	Elaeis oleifera
Humaitá FLONA	cajuaçu	Anacardiaceae	Anacardium spruceanum
Humaitá FLONA	canela-de-velho	Melastomataceae	Miconia serialis
Humaitá FLONA	caramuri	Sapotaceae	Micropholis sp.
Humaitá FLONA	caranaí	Arecaceae	Lepidocaryum sp.
Humaitá FLONA	carapanaúba	Apocynaceae	Aspidosperma schultesii
Humaitá FLONA	cariuba	Sapotaceae	Pouteria peruviensis
Humaitá FLONA	castanha	Lecythidaceae	Bertholletia excelsa
Humaitá FLONA	castanharana	Indet	Indet
Humaitá FLONA	caxinguba	Indet	Indet
Humaitá FLONA	cedro	Meliaceae	Cedrela odorata
Humaitá FLONA	cedro-mara	Indet	Indet
Humaitá FLONA	cedro-vermelho	Meliaceae	Cedrela odorata
Humaitá FLONA	cedrorana	Indet	Indet
Humaitá FLONA	copaíba	Fabaceae	Copaifera piresii
Humaitá FLONA	copaibarana	Fabaceae	Indet
Humaitá FLONA	cupiúba	Indet	Indet
Humaitá FLONA	cumaru	Fabaceae	Dipteryx odorata
Humaitá FLONA	cupuaçu-do-mato	Malvaceae	Theobroma sp.
Humaitá FLONA	envira	Annonaceae	Indet
Humaitá FLONA	envira-amargosa	Annonaceae	Guatteria punctata
Humaitá FLONA	envira-porquinho	Annonaceae	Duguetia flagellaris
Humaitá FLONA	farinha-seca	Indet	Indet
Humaitá FLONA	farinha-seca	Indet	Indet
Humaitá FLONA	fava	Fabaceae	Amphiodon effusus
Humaitá FLONA	fava-ferro	Indet	Indet
Humaitá FLONA	garapeira	Fabaceae	Apuleia leiocarpa
Humaitá FLONA	jenipapo	Rubiaceae	Genipa americana
Humaitá FLONA	goiaba-araçá	Indet	Indet
Humaitá FLONA	goiaba-de-anta	Melastomataceae	Bellucia grossularioides
Humaitá FLONA	guariúba	Moraceae	Indet
Humaitá FLONA	inajá	Arecaceae	Attalea maripa
Humaitá FLONA	ingá-de-macaco	Fabaceae	Inga sp.
Humaitá FLONA	ingá-peludo	Fabaceae	Inga sp.
Humaitá FLONA	pau-darco-branco	Bignoniaceae	Handroanthus sp.
Humaitá FLONA	pau-darco-roxo	Indet	Indet
Humaitá FLONA	itaúba	Lauraceae	Mezilaurus itauba
Humaitá FLONA	jacareuba	Calophyllaceae	Calophyllum brasiliense
Humaitá FLONA	jarana	Lecythidaceae	Lecythis lurida
Humaitá FLONA	jatobá	Fabaceae	Hymenaea courbaril
Humaitá FLONA	jequitibá	Lecythidaceae	Cariniana sp.
Humaitá FLONA	jitó	Meliaceae	Guarea sp.
Humaitá FLONA	jutaí	Fabaceae	Hymenaea intermedia
Humaitá FLONA	lacre-vermelho	Hypericaceae	Vismia guianensis
Humaitá FLONA	louro	Indet	Indet
Humaitá FLONA	louro-abacate	Lauraceae	Indet
Humaitá FLONA	louro-aritú	Lauraceae	Rhodostemonodaphne sordida
Humaitá FLONA	louro-bosta	Indet	Indet
Humaitá FLONA	louro-branco	Lauraceae	Ocotea sp.
Humaitá FLONA	louro-cheiroso	Lauraceae	Licaria macrophylla
Humaitá FLONA	louro-itaúba	Lauraceae	Ocotea rhodophylla
Humaitá FLONA	louro-jacaré	Indet	Indet
Humaitá FLONA	louro-moises	Indet	Indet
Humaitá FLONA	louro-pimenta	Lauraceae	Rhodostemonodaphne sordida
Humaitá FLONA	louro-podre	Indet	Indet
Humaitá FLONA	louro-roxo	Lauraceae	Licaria brasiliensis
Humaitá FLONA	louro-sacaca	Indet	Indet
Humaitá FLONA	macucu	Indet	Indet
Humaitá FLONA	mandioqueiro	Moraceae	Perebea sp.
Humaitá FLONA	maparajuba	Indet	Indet
Humaitá FLONA	maracatiara	Anacardiaceae	Astronium lecointei
Humaitá FLONA	marapiranga	Indet	Indet
Humaitá FLONA	marupá	Simaroubaceae	Simarouba amara
Humaitá FLONA	massaranduba	Sapotaceae	Manilkara huberi
Humaitá FLONA	miratinga	Moraceae	Pseudolmedia sp.
Humaitá FLONA	mulateiro	Myrtaceae	Myrcia rufipila
Humaitá FLONA	murumuru	Arecaceae	Astrocaryum murumuru
Humaitá FLONA	mururé	Moraceae	Brosimum sp.
Humaitá FLONA	orelha-de-burro	Indet	Indet
Humaitá FLONA	ouricuri	Arecaceae	Attalea phalerata
Humaitá FLONA	pajurá	Chrysobalanaceae	Couepia bracteosa
Humaitá FLONA	palheira	Arecaceae	Attalea maripa
Humaitá FLONA	pama	Indet	Indet
Humaitá FLONA	pama-de-índio	Indet	Indet
Humaitá FLONA	paracuuba	Fabaceae	Indet
Humaitá FLONA	patauá	Arecaceae	Oenocarpus bataua
Humaitá FLONA	quina	Apocynaceae	Aspidosperma schultesii
Humaitá FLONA	paxiúba	Arecaceae	Socratea exorrhiza
Humaitá FLONA	piquiá	Caryocaraceae	Caryocar villosum
Humaitá FLONA	piquiarana	Caryocaraceae	Indet
Humaitá FLONA	piranheira	Picrodendraceae	Piranhea trifoliolata
Humaitá FLONA	preciosa	Lauraceae	Aniba canelilla
Humaitá FLONA	purui	Rubiaceae	Alibertia sp.
Humaitá FLONA	quina	Apocynaceae	Aspidosperma schultesii
Humaitá FLONA	ripeira	Lecythidaceae	Eschweilera sp.
Humaitá FLONA	sacaca	Euphorbiaceae	Croton cajucara
Humaitá FLONA	sapateiro	Melastomataceae	Miconia manauara
Humaitá FLONA	seringa	Euphorbiaceae	Hevea brasiliensis
Humaitá FLONA	sorva	Apocynaceae	Couma macrocarpa
Humaitá FLONA	sorvinha	Apocynaceae	Couma utilis
Humaitá FLONA	sucupira	Fabaceae	Diplotropis martiusii
Humaitá FLONA	sucuuba	Apocynaceae	Himatanthus bracteatus
Humaitá FLONA	samaúma	Malvaceae	Ceiba pentandra
Humaitá FLONA	tamanqueiro	Rutaceae	Zanthoxylum rhoifolium
Humaitá FLONA	tento	Fabaceae	Zygia racemosa
Humaitá FLONA	tento-vermelho	Fabaceae	Zygia racemosa
Humaitá FLONA	tentorana	Fabaceae	Ormosia sp.
Humaitá FLONA	tucumã	Arecaceae	Astrocaryum aculeatum
Humaitá FLONA	tucumãí	Arecaceae	Astrocaryum gynacanthum
Humaitá FLONA	ubim	Arecaceae	Geonoma sp.
Humaitá FLONA	ucuuba	Myristicaceae	Virola sp.
Humaitá FLONA	uiqui	Indet	Indet
Humaitá FLONA	uxi-coroa	Humiriaceae	Duckesia verrucosa
Humaitá FLONA	uxi-liso	Humiriaceae	Endopleura uchi
Humaitá FLONA	virola	Myristicaceae	Virola surinamensis
Humaitá FLONA	xuru	Lecythidaceae	Couratari sp.
Jiahui TI	abiu	Sapotaceae	Pouteria caimito
Jiahui TI	abiu-pequeno	Sapotaceae	Pradosia surinamensis
Jiahui TI	açaí-solitário	Arecaceae	Euterpe precatoria
Jiahui TI	acariquara	Olacaceae	Minquartia guianensis
Jiahui TI	amapá-grande	Moraceae	Pseudolmedia macrophylla
Jiahui TI	andiroba	Meliaceae	Carapa procera
Jiahui TI	angelim	Fabaceae	Hymenolobium modestum
Jiahui TI	angelim-amargo	Indet	Indet
Jiahui TI	angelim-ferro	Indet	Indet
Jiahui TI	angelim-pedra	Fabaceae	Indet
Jiahui TI	araçá	Indet	Indet
Jiahui TI	azeitona	Chrysobalanaceae	Licania egleri
Jiahui TI	babaçu	Arecaceae	Attalea speciosa
Jiahui TI	bacaba	Arecaceae	Oenocarpus bacaba
Jiahui TI	bacabinha	Arecaceae	Oenocarpus minor
Jiahui TI	bajinha	Indet	Indet
Jiahui TI	barbudo	Indet	Indet
Jiahui TI	bombom-de-índio	Arecaceae	Bactris sp.
Jiahui TI	breu	Burseraceae	Protium heptaphyllum
Jiahui TI	breu-branco	Burseraceae	Protium sp.
Jiahui TI	breu-grande	Indet	Indet
Jiahui TI	breu-pequeno	Burseraceae	Protium trifoliolatum
Jiahui TI	buriti	Arecaceae	Mauritia flexuosa
Jiahui TI	bururé	Indet	Indet
Jiahui TI	cacau-do-mato	Malvaceae	Theobroma speciosum
Jiahui TI	caioé	Arecaceae	Elaeis oleifera
Jiahui TI	caiutinga	Indet	Indet
Jiahui TI	caju-do-mato	Anacardiaceae	Anacardium spruceanum
Jiahui TI	caranaí	Arecaceae	Lepidocaryum sp.
Jiahui TI	carapanaúba	Apocynaceae	Aspidosperma schultesii
Jiahui TI	cariuba	Sapotaceae	Pouteria peruviensis
Jiahui TI	castanha	Lecythidaceae	Bertholletia excelsa
Jiahui TI	castanha-de-arara	Euphorbiaceae	Joannesia heveoides
Jiahui TI	castanha-sapucaia	Lecythidaceae	Lecythis holcogyne
Jiahui TI	castanha-vermelha	Sapotaceae	Chrysophyllum prieurii
Jiahui TI	cedrinho	Vochysiaceae	Erisma bicolor
Jiahui TI	cedro	Meliaceae	Cedrela odorata
Jiahui TI	cedro-agoana	Meliaceae	Swietenia macrophylla
Jiahui TI	cedro-mara	Indet	Indet
Jiahui TI	cedro-rosa	Meliaceae	Cedrela odorata
Jiahui TI	cedro-vermelho	Meliaceae	Cedrela odorata
Jiahui TI	copaíba	Fabaceae	Copaifera piresii
Jiahui TI	copaíba-angelim	Indet	Indet
Jiahui TI	copaíba-cuiarana	Fabaceae	Copaifera multijuga
Jiahui TI	copaíba-jacaré	Indet	Indet
Jiahui TI	copaíba-marimari	Fabaceae	Copaifera piresii
Jiahui TI	cuiarana	Combretaceae	Terminalia sp.
Jiahui TI	cumaru	Fabaceae	Dipteryx odorata
Jiahui TI	cupuaçu-do-mato	Malvaceae	Theobroma sp.
Jiahui TI	embaúba	Urticaceae	Cecropia sp.
Jiahui TI	envira	Annonaceae	Indet
Jiahui TI	fava	Fabaceae	Amphiodon effusus
Jiahui TI	garapeira	Fabaceae	Apuleia leiocarpa
Jiahui TI	jenipapo	Rubiaceae	Genipa americana
Jiahui TI	goiaba-araçá	Indet	Indet
Jiahui TI	inajá	Arecaceae	Attalea maripa
Jiahui TI	ingá-cancan	Fabaceae	Inga sp.
Jiahui TI	ingá-chichica	Fabaceae	Inga sp.
Jiahui TI	ingá-comprido	Fabaceae	Inga sp.
Jiahui TI	ingá-cururu	Fabaceae	Inga sp.
Jiahui TI	ingá-do-mato	Fabaceae	Inga sp.
Jiahui TI	ingá-açu	Fabaceae	Inga sp.
Jiahui TI	ingaí	Fabaceae	Inga sp.
Jiahui TI	pau-darco	Bignoniaceae	Handroanthus sp.
Jiahui TI	itaúba	Lauraceae	Mezilaurus itauba
Jiahui TI	itaúba-araçá	Indet	Indet
Jiahui TI	itaúba-branca	Indet	Indet
Jiahui TI	itaúba-preta	Lauraceae	Ocotea splendens
Jiahui TI	jatobá	Fabaceae	Hymenaea courbaril
Jiahui TI	jurupare	Indet	Indet
Jiahui TI	jutaí	Fabaceae	Hymenaea intermedia
Jiahui TI	lacre	Hypericaceae	Vismia guianensis
Jiahui TI	libra	Indet	Indet
Jiahui TI	louro-bosta	Indet	Indet
Jiahui TI	louro-espírito-santo	Indet	Indet
Jiahui TI	louro-ferro	Indet	Indet
Jiahui TI	louro-goiaba	Indet	Indet
Jiahui TI	louro-preto	Lauraceae	Indet
Jiahui TI	louro-rosa	Lauraceae	Aniba sp.
Jiahui TI	pajurá	Chrysobalanaceae	Couepia bracteosa
Jiahui TI	macucu	Indet	Indet
Jiahui TI	mandioqueiro	Moraceae	Perebea sp.
Jiahui TI	mão-de-cachorro	Moraceae	Perebea sp.
Jiahui TI	maparajuba	Indet	Indet
Jiahui TI	maracatiara	Anacardiaceae	Astronium lecointei
Jiahui TI	marajá	Arecaceae	Bactris sp.
Jiahui TI	marapiranga	Indet	Indet
Jiahui TI	marupá	Simaroubaceae	Simarouba amara
Jiahui TI	massaranduba	Sapotaceae	Manilkara huberi
Jiahui TI	matamatá	Lecythidaceae	Eschweilera parviflora
Jiahui TI	mirasacaca	Indet	Indet
Jiahui TI	mulateiro	Myrtaceae	Myrcia rufipila
Jiahui TI	mulungu	Fabaceae	Erythrina verna
Jiahui TI	mumbaca	Arecaceae	Astrocaryum gynacanthum
Jiahui TI	olho-de-boi	Sapindaceae	Talisia esculenta
Jiahui TI	ouricuri	Arecaceae	Attalea phalerata
Jiahui TI	pama	Indet	Indet
Jiahui TI	pama-grande	Indet	Indet
Jiahui TI	pama-pequena	Moraceae	Clarisia ilicifolia
Jiahui TI	pama-pequeninha	Indet	Indet
Jiahui TI	pama-vermelha	Indet	Indet
Jiahui TI	patauá	Arecaceae	Oenocarpus bataua
Jiahui TI	pau-rosa	Lauraceae	Aniba rosodora
Jiahui TI	paxiúba	Arecaceae	Socratea exorrhiza
Jiahui TI	pé-de-jaboti	Annonaceae	Duguetia stenantha
Jiahui TI	peroba	Apocynaceae	Aspidosperma desmanthum
Jiahui TI	piquiá	Caryocaraceae	Caryocar villosum
Jiahui TI	piquiarana	Caryocaraceae	Caryocar glabrum
Jiahui TI	piriquiteiro	Indet	Indet
Jiahui TI	pitomba	Ebenaceae	Diospyros artanthifolia
Jiahui TI	preciosa	Lauraceae	Aniba canelilla
Jiahui TI	purui	Rubiaceae	Alibertia sp.
Jiahui TI	quina	Apocynaceae	Aspidosperma schultesii
Jiahui TI	sangue-de-dragão	Euphorbiaceae	Croton sp.
Jiahui TI	seringa	Euphorbiaceae	Hevea brasiliensis
Jiahui TI	sorva	Apocynaceae	Couma macrocarpa
Jiahui TI	sorvinha	Apocynaceae	Couma utilis
Jiahui TI	tamutuga	Indet	Indet
Jiahui TI	taperebá	Anacardiaceae	Spondias mombin
Jiahui TI	tauarí	Lecythidaceae	Couratari sp.
Jiahui TI	tento	Fabaceae	Zygia racemosa
Jiahui TI	tento-vermelho	Fabaceae	Zygia racemosa
Jiahui TI	tucumã	Arecaceae	Astrocaryum aculeatum
Jiahui TI	tucumãí	Arecaceae	Astrocaryum gynacanthum
Jiahui TI	uiuauhu	Myrtaceae	Myrcia rufipila
Jiahui TI	urucum-do-mato	Bixaceae	Bixa arborea
Jiahui TI	uxi-chichica	Indet	Indet
Jiahui TI	uxi-coroa	Humiriaceae	Duckesia verrucosa
Jiahui TI	uxi-liso	Humiriaceae	Endopleura uchi
Jiahui TI	verejão	Indet	Indet
Jiahui TI	xuru	Lecythidaceae	Couratari sp.
Piagaçu-Purus RDS	abacate	Lauraceae	Persea americana
Piagaçu-Purus RDS	abacatirana	Indet	Indet
Piagaçu-Purus RDS	abiu	Sapotaceae	Pouteria caimito
Piagaçu-Purus RDS	abiu-balaio	Indet	Indet
Piagaçu-Purus RDS	abiu-coroa	Indet	Indet
Piagaçu-Purus RDS	abiu-do-mato	Indet	Indet
Piagaçu-Purus RDS	abiu-ferro	Sapotaceae	Micropholis cf. casiquiarensis; Pouteria caimito
Piagaçu-Purus RDS	abiu-grande	Sapotaceae	Pouteria macrocarpa
Piagaçu-Purus RDS	abiu-liso	Indet	Indet
Piagaçu-Purus RDS	abiu-tramori	Indet	Indet
Piagaçu-Purus RDS	abiu-vermelho	Indet	Indet
Piagaçu-Purus RDS	abiurana	Sapotaceae	Pouteria glomerata
Piagaçu-Purus RDS	abota	Indet	Indet
Piagaçu-Purus RDS	açaí-caroço	Indet	Indet
Piagaçu-Purus RDS	açaí-chumbinho	Arecaceae	Euterpe caatinga
Piagaçu-Purus RDS	açaí-solitário	Arecaceae	Euterpe precatoria
Piagaçu-Purus RDS	acapú	Indet	Indet
Piagaçu-Purus RDS	ajaraí	Sapotaceae	Pouteria gomphiifolia
Piagaçu-Purus RDS	amapá	Moraceae	Brosimum utile
Piagaçu-Purus RDS	amapá-garrote	Moraceae	Brosimum parinarioides
Piagaçu-Purus RDS	amarelinho	Indet	Indet
Piagaçu-Purus RDS	ananarana	Indet	Indet
Piagaçu-Purus RDS	ananí	Clusiaceae	Symphonia globulifera
Piagaçu-Purus RDS	andiroba	Meliaceae	Carapa guyanensis
Piagaçu-Purus RDS	angelim	Fabaceae	Dinizia excelsa
Piagaçu-Purus RDS	angelim-angico	Indet	Indet
Piagaçu-Purus RDS	angelim-manteiga	Indet	Indet
Piagaçu-Purus RDS	angelim-melancia	Indet	Indet
Piagaçu-Purus RDS	angelim-pedra	Fabaceae	Indet
Piagaçu-Purus RDS	angelim-rajado	Fabaceae	Zygia racemosa
Piagaçu-Purus RDS	apuruí	Rubiaceae	Alibertia cf. occidentalis; Alibertia duckeana; Alibertia edulis; Alibertia sp.
Piagaçu-Purus RDS	apuruí-cascudo	Rubiaceae	Alibertia edulis
Piagaçu-Purus RDS	apuruí-peludo	Rubiaceae	Duroia macrophylla
Piagaçu-Purus RDS	apuruizinho	Rubiaceae	Duroia genipoides
Piagaçu-Purus RDS	acariquara	Olacaceae	Minquartia guianensis
Piagaçu-Purus RDS	araçá	Lauraceae / Myrtaceae	Endlicheria anomala / Myrcia umbraticola
Piagaçu-Purus RDS	aracaqui	Indet	Indet
Piagaçu-Purus RDS	aracati	Annonaceae	Annona sp.
Piagaçu-Purus RDS	araparí	Fabaceae	Macrolobium acaciifolium
Piagaçu-Purus RDS	araparí-preto	Fabaceae	Macrolobium sp.
Piagaçu-Purus RDS	araroba	Indet	Indet
Piagaçu-Purus RDS	araticum	Annonaceae	Annona montana
Piagaçu-Purus RDS	arcanfurina	Indet	Indet
Piagaçu-Purus RDS	aroamari	Indet	Indet
Piagaçu-Purus RDS	assacu	Euphorbiaceae	Hura crepitans
Piagaçu-Purus RDS	atumã	Celastraceae	Peritassa dulcis
Piagaçu-Purus RDS	azeitona	Myrtaceae	Syzygium cumini
Piagaçu-Purus RDS	babaçu	Arecaceae	Attalea speciosa
Piagaçu-Purus RDS	babaçu-várzea	Indet	Indet
Piagaçu-Purus RDS	bacaba	Arecaceae	Oenocarpus bacaba
Piagaçu-Purus RDS	bacaba-branca	Indet	Indet
Piagaçu-Purus RDS	bacaba-vermelha	Indet	Indet
Piagaçu-Purus RDS	bacabão	Arecaceae	Oenocarpus bacaba
Piagaçu-Purus RDS	bacabinha	Arecaceae	Oenocarpus mapora; Oenocarpus minor
Piagaçu-Purus RDS	bacurí	Clusiaceae	Garcinia brasiliensis; Garcinia madruno
Piagaçu-Purus RDS	bacurí-coroa	Clusiaceae	Garcinia madruno
Piagaçu-Purus RDS	bacurí-de-anta	Clusiaceae	Garcinia madruno
Piagaçu-Purus RDS	bacurí-de-anta-roxo	Indet	Indet
Piagaçu-Purus RDS	bacurí-liso	Clusiaceae	Indet
Piagaçu-Purus RDS	bacurí-várzea	Indet	Indet
Piagaçu-Purus RDS	balaio	Moraceae	Naucleopsis ulei
Piagaçu-Purus RDS	balata	Sapotaceae	Indet
Piagaçu-Purus RDS	biribá	Annonaceae	Annona mucosa
Piagaçu-Purus RDS	biribá-verde	Indet	Indet
Piagaçu-Purus RDS	bochecha-de-velho	Indet	Indet
Piagaçu-Purus RDS	breu	Burseraceae	Protium sp.
Piagaçu-Purus RDS	breu-branco	Burseraceae	Protium ferrugineum
Piagaçu-Purus RDS	buçú	Indet	Indet
Piagaçu-Purus RDS	buriti	Arecaceae	Mauritia flexuosa
Piagaçu-Purus RDS	buritirana	Arecaceae	Mauritiella aculeata
Piagaçu-Purus RDS	cabeça-de-arara	Indet	Indet
Piagaçu-Purus RDS	cacau	Malvaceae	Theobroma cacao
Piagaçu-Purus RDS	cacau-açu	Malvaceae	Theobroma speciosum
Piagaçu-Purus RDS	cacau-azul	Malvaceae	Theobroma sylvestre
Piagaçu-Purus RDS	cacau-do-mato	Malvaceae	Theobroma speciosum
Piagaçu-Purus RDS	cacau-jacaré	Malvaceae	Herrania mariae
Piagaçu-Purus RDS	cacau-nambu	Indet	Indet
Piagaçu-Purus RDS	cacauí	Malvaceae	Herrania mariae
Piagaçu-Purus RDS	caioé	Arecaceae	Elaeis oleifera
Piagaçu-Purus RDS	caju	Anacardiaceae	Anacardium occidentale
Piagaçu-Purus RDS	cajuaçu	Anacardiaceae	Anacardium parvifolium
Piagaçu-Purus RDS	cajuí	Anacardiaceae	Anacardium parvifolium
Piagaçu-Purus RDS	cajuí-folhinha	Indet	Indet
Piagaçu-Purus RDS	cajurana	Simaroubaceae	Simaba orinocensis
Piagaçu-Purus RDS	camaçari	Indet	Indet
Piagaçu-Purus RDS	camu-camu	Myrtaceae	Myrciaria dubia
Piagaçu-Purus RDS	canela-de-jacamim	Indet	Indet
Piagaçu-Purus RDS	canela-de-velho	Melastomataceae	Miconia serialis
Piagaçu-Purus RDS	capitari	Bignoniaceae	Handroanthus barbatus
Piagaçu-Purus RDS	capurana	Fabaceae	Campsiandra angustifolia
Piagaçu-Purus RDS	caraipé	Chrysobalanaceae	Licania sp.
Piagaçu-Purus RDS	cramuri	Sapotaceae	Chrysophyllum sp.
Piagaçu-Purus RDS	caramuri	Sapotaceae	Chrysophyllum sp.
Piagaçu-Purus RDS	caranã	Arecaceae	Indet
Piagaçu-Purus RDS	caranaí	Arecaceae	Mauritiella armata
Piagaçu-Purus RDS	carapanaúba	Apocynaceae	Aspidosperma nitidum
Piagaçu-Purus RDS	carnaúba	Arecaceae	Indet
Piagaçu-Purus RDS	caroceiro	Indet	Indet
Piagaçu-Purus RDS	carolaçu	Indet	Indet
Piagaçu-Purus RDS	castanha	Lecythidaceae	Bertholletia excelsa
Piagaçu-Purus RDS	castanha-de-cutia	Chrysobalanaceae	Acioa edulis
Piagaçu-Purus RDS	castanha-peruano	Indet	Indet
Piagaçu-Purus RDS	castanha-vermelha	Sapotaceae	Chrysophyllum prieurii
Piagaçu-Purus RDS	castanharana	Sapotaceae	Micropholis venulosa
Piagaçu-Purus RDS	cauaçu	Indet	Indet
Piagaçu-Purus RDS	cauxurana	Indet	Indet
Piagaçu-Purus RDS	caxinguba	Moraceae	Ficus insipida
Piagaçu-Purus RDS	cedrinho	Indet	Indet
Piagaçu-Purus RDS	cedro	Meliaceae	Cedrela odorata
Piagaçu-Purus RDS	cedro-roxo	Meliaceae	Cedrela odorata
Piagaçu-Purus RDS	cedro-vermelho	Meliaceae	Cedrela odorata
Piagaçu-Purus RDS	cedrorana	Fabaceae	Cedrelinga cateniformis
Piagaçu-Purus RDS	choru	Indet	Indet
Piagaçu-Purus RDS	coco	Arecaceae	Cocos nucifera
Piagaçu-Purus RDS	copaíba	Fabaceae	Copaifera sp.
Piagaçu-Purus RDS	copaibarana	Fabaceae	Macrolobium microcalyx
Piagaçu-Purus RDS	coração-de-nego	Indet	Indet
Piagaçu-Purus RDS	cumaru	Fabaceae	Dipteryx odorata
Piagaçu-Purus RDS	cumaru-de-ferro	Indet	Indet
Piagaçu-Purus RDS	cupiúba	Goupiaceae	Goupia glabra
Piagaçu-Purus RDS	cupiubinha	Indet	Indet
Piagaçu-Purus RDS	cupuaçu	Malvaceae	Theobroma grandiflorum
Piagaçu-Purus RDS	cupuí	Malvaceae	Theobroma cf. microcarpum; Theobroma subincanum
Piagaçu-Purus RDS	cupurana	Indet	Indet
Piagaçu-Purus RDS	currimboque	Indet	Indet
Piagaçu-Purus RDS	curuá	Indet	Indet
Piagaçu-Purus RDS	curuaçu	Indet	Indet
Piagaçu-Purus RDS	dema	Indet	Indet
Piagaçu-Purus RDS	embaúba	Urticaceae	Cecropia sp.
Piagaçu-Purus RDS	embaúba-branca	Indet	Indet
Piagaçu-Purus RDS	embaúba-vermelha	Indet	Indet
Piagaçu-Purus RDS	envira	Annonaceae	Duguetia sp.; Fusaea longifolia
Piagaçu-Purus RDS	envira-amarela	Annonaceae	Guatteria sp.
Piagaçu-Purus RDS	envira-fofa	Annonaceae	Guatteria sp.
Piagaçu-Purus RDS	envira-jacaré	Indet	Indet
Piagaçu-Purus RDS	envira-piriquita	Indet	Indet
Piagaçu-Purus RDS	envira-preta	Annonaceae	Indet
Piagaçu-Purus RDS	envira-surucucu	Annonaceae	Indet
Piagaçu-Purus RDS	envira-taia	Annonaceae	Ephedranthus amazonicus
Piagaçu-Purus RDS	envira-vassourinha	Annonaceae	Xylopia sp.
Piagaçu-Purus RDS	envira-vermelha	Annonaceae	Guatteriopsis sp.
Piagaçu-Purus RDS	envirola	Indet	Indet
Piagaçu-Purus RDS	escorrega-macaco	Fabaceae	Peltogyne paniculata
Piagaçu-Purus RDS	fava	Fabaceae	Parkia sp.
Piagaçu-Purus RDS	fel-de-anta	Indet	Indet
Piagaçu-Purus RDS	fel-de-tambaqui	Indet	Indet
Piagaçu-Purus RDS	garrote	Moraceae	Brosimum parinarioides
Piagaçu-Purus RDS	goiaba	Myrtaceae	Psidium guajava
Piagaçu-Purus RDS	goiaba-de-anta	Melastomataceae	Bellucia dichotoma; Bellucia grossularioides
Piagaçu-Purus RDS	gonçalo	Indet	Indet
Piagaçu-Purus RDS	graviola	Indet	Indet
Piagaçu-Purus RDS	guariúba	Moraceae	Clarisia racemosa
Piagaçu-Purus RDS	guariúba-amarela	Moraceae	Clarisia racemosa
Piagaçu-Purus RDS	guariúba-branca	Indet	Indet
Piagaçu-Purus RDS	guaruba	Vochysiaceae	Vochysia sp.
Piagaçu-Purus RDS	guaruba-dura	Indet	Indet
Piagaçu-Purus RDS	guarubarana	Indet	Indet
Piagaçu-Purus RDS	inajá	Arecaceae	Attalea maripa
Piagaçu-Purus RDS	inaúba	Indet	Indet
Piagaçu-Purus RDS	ingá	Fabaceae	Inga marginata
Piagaçu-Purus RDS	ingá-açu	Fabaceae	Inga cinnamomea
Piagaçu-Purus RDS	ingá-cipó	Fabaceae	Inga edulis
Piagaçu-Purus RDS	ingá-de-macaco	Fabaceae	Inga marginata; Inga paraensis
Piagaçu-Purus RDS	ingá-do-rio	Indet	Indet
Piagaçu-Purus RDS	ingá-mari	Indet	Indet
Piagaçu-Purus RDS	ingá-muin	Indet	Indet
Piagaçu-Purus RDS	ingá-xixica	Fabaceae	Inga cf. disticha
Piagaçu-Purus RDS	itaúba	Lauraceae	Mezilaurus itauba
Piagaçu-Purus RDS	itaúba-preta	Lauraceae	Ocotea splendens
Piagaçu-Purus RDS	itaúba-vermelha	Lauraceae	Mezilaurus itauba
Piagaçu-Purus RDS	itaubarana	Fabaceae	Acosmium nitens
Piagaçu-Purus RDS	jaca	Moraceae	Artocarpus heterophyllus
Piagaçu-Purus RDS	jacareuba	Calophyllaceae	Calophyllum brasiliense
Piagaçu-Purus RDS	jacitara	Indet	Indet
Piagaçu-Purus RDS	jambo	Bignoniaceae	Syzygium malaccense
Piagaçu-Purus RDS	japurá	Vochysiaceae	Erisma japura
Piagaçu-Purus RDS	jarana	Lecythidaceae	Lecythis lurida
Piagaçu-Purus RDS	jarina	Arecaceae	Phytelephas macrocarpa
Piagaçu-Purus RDS	jatobá	Fabaceae	Hymenaea courbaril
Piagaçu-Purus RDS	jauarí	Arecaceae	Astrocaryum jauari
Piagaçu-Purus RDS	jenipapo	Rubiaceae	Genipa americana
Piagaçu-Purus RDS	jenipapo-igapó	Rubiaceae	Genipa spruceana
Piagaçu-Purus RDS	joão-mole	Vochysiaceae	Vochysia sp.
Piagaçu-Purus RDS	joão-mole-branco	Indet	Indet
Piagaçu-Purus RDS	joão-mole-vermelho	Indet	Indet
Piagaçu-Purus RDS	jauarí	Arecaceae	Astrocaryum jauari
Piagaçu-Purus RDS	jurubeba	Indet	Indet
Piagaçu-Purus RDS	jutaí	Fabaceae	Hymenaea courbaril
Piagaçu-Purus RDS	jutaí-pororoca	Fabaceae	Indet
Piagaçu-Purus RDS	lacre	Hypericaceae	Indet
Piagaçu-Purus RDS	louro	Lauraceae	Ocotea sp.
Piagaçu-Purus RDS	louro-abacate	Lauraceae	Aniba terminalis
Piagaçu-Purus RDS	louro-aritú	Lauraceae	Licaria aritu
Piagaçu-Purus RDS	louro-alcanfor	Indet	Indet
Piagaçu-Purus RDS	louro-amarelo	Lauraceae	Aniba sp.
Piagaçu-Purus RDS	louro-anoirá	Indet	Indet
Piagaçu-Purus RDS	louro-aritú	Lauraceae	Licaria aritu
Piagaçu-Purus RDS	louro-barbado	Indet	Indet
Piagaçu-Purus RDS	louro-bombom	Indet	Indet
Piagaçu-Purus RDS	louro-bosta	Indet	Indet
Piagaçu-Purus RDS	louro-cascudo	Indet	Indet
Piagaçu-Purus RDS	louro-cedro	Indet	Indet
Piagaçu-Purus RDS	louro-chumbo	Lauraceae	Aniba sp.
Piagaçu-Purus RDS	louro-chumbo-vázea	Lauraceae	Aniba sp.
Piagaçu-Purus RDS	louro-da-terra-firme	Indet	Indet
Piagaçu-Purus RDS	louro-espelho	Indet	Indet
Piagaçu-Purus RDS	louro-espinho	Indet	Indet
Piagaçu-Purus RDS	louro-feno	Indet	Indet
Piagaçu-Purus RDS	louro-gamela	Lauraceae	Nectandra reticulata
Piagaçu-Purus RDS	louro-gamela	Lauraceae	Nectandra reticulata
Piagaçu-Purus RDS	louro-goiaba	Indet	Indet
Piagaçu-Purus RDS	louro-inamuí	Lauraceae	Ocotea cymbarum
Piagaçu-Purus RDS	louro-itaúba	Lauraceae	Mezilaurus itauba
Piagaçu-Purus RDS	louro-jacaré	Lauraceae	Aniba sp.
Piagaçu-Purus RDS	louro-pimenta	Lauraceae	Ocotea canaliculata
Piagaçu-Purus RDS	louro-preto	Lauraceae	Dicypellium manausense
Piagaçu-Purus RDS	louro-puxurí	Lauraceae	Aniba parviflora
Piagaçu-Purus RDS	louro-rosa	Lauraceae	Aniba sp.
Piagaçu-Purus RDS	macacarecuia	Indet	Indet
Piagaçu-Purus RDS	macacaúba	Fabaceae	Platymiscium trinitatis
Piagaçu-Purus RDS	massaranduba	Sapotaceae	Manilkara sp.
Piagaçu-Purus RDS	massaranduba-vázea	Sapotaceae	Manilkara sp.
Piagaçu-Purus RDS	macucu	Indet	Indet
Piagaçu-Purus RDS	mamoí	Indet	Indet
Piagaçu-Purus RDS	manga	Anacardiaceae	Mangifera indica
Piagaçu-Purus RDS	manixi	Moraceae	Brosimum lactescens
Piagaçu-Purus RDS	maparajuba	Sapotaceae	Neoxythece sp.
Piagaçu-Purus RDS	marajá	Arecaceae	Bactris bifida; Bactris concinna
Piagaçu-Purus RDS	marajá-pequeno	Arecaceae	Bactris bifida; Bactris concinna
Piagaçu-Purus RDS	marapuama	Olacaceae	Ptychopetalum uncinatum
Piagaçu-Purus RDS	maria-pitanga	Myrtaceae	Eugenia protenta
Piagaçu-Purus RDS	marimari	Fabaceae	Cassia leiandra
Piagaçu-Purus RDS	marirana	Chrysobalanaceae	Couepia subcordata
Piagaçu-Purus RDS	marmelada	Rubiaceae	Alibertia edulis
Piagaçu-Purus RDS	marupá	Simaroubaceae	Simarouba amara
Piagaçu-Purus RDS	marupá-branco	Indet	Indet
Piagaçu-Purus RDS	marupá-cajurana	Indet	Indet
Piagaçu-Purus RDS	marupá-preto	Indet	Indet
Piagaçu-Purus RDS	marupá-roxo	Indet	Indet
Piagaçu-Purus RDS	matamatá	Indet	Indet
Piagaçu-Purus RDS	maúba	Indet	Indet
Piagaçu-Purus RDS	maubarana	Indet	Indet
Piagaçu-Purus RDS	mirapiranga	Indet	Indet
Piagaçu-Purus RDS	mirarana	Indet	Indet
Piagaçu-Purus RDS	mirarema	Indet	Indet
Piagaçu-Purus RDS	miratoá	Indet	Indet
Piagaçu-Purus RDS	molongó	Apocynaceae	Indet
Piagaçu-Purus RDS	muiratinga	Moraceae	Maquira coriacea
Piagaçu-Purus RDS	mulateiro	Fabaceae	Peltogyne paniculata
Piagaçu-Purus RDS	mumbaca	Arecaceae	Astrocaryum gynacanthum
Piagaçu-Purus RDS	munguba	Malvaceae	Pseudobombax munguba
Piagaçu-Purus RDS	murapiranga	Indet	Indet
Piagaçu-Purus RDS	murtinha	Myrtaceae	Eugenia lambertiana; Calyptranthes ruiziana; Mouriri sp.
Piagaçu-Purus RDS	murumuru	Arecaceae	Astrocaryum murumuru
Piagaçu-Purus RDS	mururé	Moraceae	Brosimum acutifolium
Piagaçu-Purus RDS	muruxi	Malpighiaceae	Byrsonima japurensis
Piagaçu-Purus RDS	orana	Indet	Indet
Piagaçu-Purus RDS	padurana	Indet	Indet
Piagaçu-Purus RDS	pajurá	Chrysobalanaceae	Couepia bracteosa
Piagaçu-Purus RDS	palha-preta	Arecaceae	Attalea speciosa
Piagaçu-Purus RDS	palha-preta	Indet	Indet
Piagaçu-Purus RDS	pama	Moraceae	Pseudolmedia laevis
Piagaçu-Purus RDS	papo-de-mutum	Celastraceae	Salacia elliptica; Salacia impressifolia
Piagaçu-Purus RDS	para-para	Indet	Indet
Piagaçu-Purus RDS	paracanaúba	Indet	Indet
Piagaçu-Purus RDS	paracutaca	Indet	Indet
Piagaçu-Purus RDS	paricarana	Fabaceae	Hydrochorea corymbosa
Piagaçu-Purus RDS	pariri	Sapotaceae	Pouteria pariry
Piagaçu-Purus RDS	patauá	Arecaceae	Oenocarpus bataua
Piagaçu-Purus RDS	patauá-vermelha	Arecaceae	Oenocarpus bataua
Piagaçu-Purus RDS	pau-brasil	Indet	Indet
Piagaçu-Purus RDS	pau-darco	Bignoniaceae	Handroanthus chrysanthus
Piagaçu-Purus RDS	pau-darco-ipadu	Indet	Indet
Piagaçu-Purus RDS	pau-darco-preto	Indet	Indet
Piagaçu-Purus RDS	pau-darco-roxo	Indet	Indet
Piagaçu-Purus RDS	pau-de-arara	Indet	Indet
Piagaçu-Purus RDS	pau-para-tudo	Simaroubaceae	Simaba cedron
Piagaçu-Purus RDS	pau-rosa	Lauraceae	Aniba rosodora
Piagaçu-Purus RDS	pau-sabão	Indet	Indet
Piagaçu-Purus RDS	paunã	Indet	Indet
Piagaçu-Purus RDS	paxiúba	Arecaceae	Indet
Piagaçu-Purus RDS	paxiúba-barriguda	Arecaceae	Iriartea deltoidea
Piagaçu-Purus RDS	paxiubão	Indet	Indet
Piagaçu-Purus RDS	paxiubinha	Arecaceae	Indet
Piagaçu-Purus RDS	pé-de-jaboti	Annonaceae	Duguetia stenantha
Piagaçu-Purus RDS	pepino-do-mato	Apocynaceae	Ambelania acida
Piagaçu-Purus RDS	piaçava	Arecaceae	Attalea funifera
Piagaçu-Purus RDS	piquiá	Caryocaraceae	Caryocar villosum
Piagaçu-Purus RDS	piquiá-marfim	Indet	Indet
Piagaçu-Purus RDS	piquiarana	Caryocaraceae	Caryocar glabrum
Piagaçu-Purus RDS	piranheira	Picrodendraceae	Piranhea trifoliolata
Piagaçu-Purus RDS	piriquiteiro	Indet	Indet
Piagaçu-Purus RDS	pitomba	Sapindaceae	Talisia cupularis
Piagaçu-Purus RDS	poleiro-de-pato	Indet	Indet
Piagaçu-Purus RDS	pracuuba	Fabaceae	Indet
Piagaçu-Purus RDS	preciosa	Indet	Indet
Piagaçu-Purus RDS	punã	Indet	Indet
Piagaçu-Purus RDS	pupunha	Arecaceae	Bactris gasipaes
Piagaçu-Purus RDS	pupunharana	Arecaceae	Bactris bidentula; Bactris maraja
Piagaçu-Purus RDS	quina	Indet	Indet
Piagaçu-Purus RDS	roxinho	Fabaceae	Dialium guianense
Piagaçu-Purus RDS	saboneteira	Indet	Indet
Piagaçu-Purus RDS	saboneteira-várzea	Indet	Indet
Piagaçu-Purus RDS	samaúma	Malvaceae	Ceiba pentandra
Piagaçu-Purus RDS	são-gonçalo	Indet	Indet
Piagaçu-Purus RDS	sapucaia	Lecythidaceae	Lecythis zabucajo
Piagaçu-Purus RDS	seringa	Euphorbiaceae	Hevea pauciflora
Piagaçu-Purus RDS	seringa-barriguda	Euphorbiaceae	Hevea spruceana
Piagaçu-Purus RDS	seringa-comprida	Indet	Indet
Piagaçu-Purus RDS	seringa-itaúba	Euphorbiaceae	Hevea guianensis
Piagaçu-Purus RDS	seringa-vermelha	Euphorbiaceae	Hevea guianensis
Piagaçu-Purus RDS	sete-de-setembro	Indet	Indet
Piagaçu-Purus RDS	socoró	Melastomataceae	Mouriri sp.
Piagaçu-Purus RDS	sororoca	Indet	Indet
Piagaçu-Purus RDS	sorva	Apocynaceae	Couma sp.
Piagaçu-Purus RDS	sorvinha	Apocynaceae	Indet
Piagaçu-Purus RDS	sucupira	Fabaceae	Diplotropis martiusii
Piagaçu-Purus RDS	sucupira-amarela	Fabaceae	Enterolobium schomburgkii
Piagaçu-Purus RDS	sucupira-preta	Indet	Indet
Piagaçu-Purus RDS	sucupira-vermelha	Fabaceae	Andira parviflora
Piagaçu-Purus RDS	sucupirinha	Indet	Indet
Piagaçu-Purus RDS	sucuuba	Apocynaceae	Himatanthus sp.
Piagaçu-Purus RDS	tacacá	Malvaceae	Sterculia elata
Piagaçu-Purus RDS	tachi	Polygonaceae/ Fabaceae	Triplaris americana / Tachigali vulgaris
Piagaçu-Purus RDS	tanimbuca	Combretaceae	Terminalia macrophylla
Piagaçu-Purus RDS	tanimbuca-preta	Indet	Indet
Piagaçu-Purus RDS	taperebá	Anacardiaceae	Spondias mombin
Piagaçu-Purus RDS	taquari	Euphorbiaceae	Mabea sp.
Piagaçu-Purus RDS	tarumã	Lamiaceae	Vitex cymosa
Piagaçu-Purus RDS	tauarí	Lecythidaceae	Indet
Piagaçu-Purus RDS	tento	Fabaceae	Indet
Piagaçu-Purus RDS	tintarana	Indet	Indet
Piagaçu-Purus RDS	tucumã	Arecaceae	Astrocaryum aculeatum
Piagaçu-Purus RDS	tucumã-piranga	Indet	Indet
Piagaçu-Purus RDS	tucumãí	Arecaceae	Astrocaryum acaule
Piagaçu-Purus RDS	arara-tucupi	Fabaceae	Parkia nitida
Piagaçu-Purus RDS	ubim	Arecaceae	Geonoma deversa
Piagaçu-Purus RDS	ucuuba	Myristicaceae	Virola surinamensis
Piagaçu-Purus RDS	ucuuba-grossa	Myristicaceae	Virola surinamensis
Piagaçu-Purus RDS	uiqui	Indet	Indet
Piagaçu-Purus RDS	umari	Indet	Indet
Piagaçu-Purus RDS	umari-amarelo	Metteniusaceae	Poraqueiba paraensis
Piagaçu-Purus RDS	umari-roxo	Annonaceae	Porcelia mediocris
Piagaçu-Purus RDS	umarirana	Chrysobalanaceae	Couepia subcordata
Piagaçu-Purus RDS	ouricuri	Arecaceae	Attalea phalerata
Piagaçu-Purus RDS	urubuacanga	Malvaceae	Theobroma obovatum
Piagaçu-Purus RDS	urucurana	Indet	Indet
Piagaçu-Purus RDS	uxi	Humiriaceae	Endopleura uchi
Piagaçu-Purus RDS	uxi	Humiriaceae	Endopleura uchi
Piagaçu-Purus RDS	uxi-coroa	Indet	Indet
Piagaçu-Purus RDS	uxirana	Chrysobalanaceae	Couepia paraensis
Piagaçu-Purus RDS	violeta	Fabaceae	Peltogyne catingae
Piagaçu-Purus RDS	xixuá	Celastraceae	Maytenus guyanensis
Piagaçu-Purus RDS	xuru	Indet	Indet
Rio Ouro Preto RESEX	abiu	Sapotaceae	Pouteria caimito
Rio Ouro Preto RESEX	abiu-do-mato	Indet	Indet
Rio Ouro Preto RESEX	abiu-grande	Sapotaceae	Pouteria macrocarpa
Rio Ouro Preto RESEX	abiu-seringa	Indet	Indet
Rio Ouro Preto RESEX	abiurana	Sapotaceae	Indet
Rio Ouro Preto RESEX	açaí-solitário	Arecaceae	Euterpe precatoria
Rio Ouro Preto RESEX	açaí-touceira	Arecaceae	Euterpe oleracea
Rio Ouro Preto RESEX	amargosa	Fabaceae	Hymenolobium sp.
Rio Ouro Preto RESEX	amargoso	Indet	Indet
Rio Ouro Preto RESEX	angelim	Fabaceae	Indet
Rio Ouro Preto RESEX	angelim-mandioqueiro	Indet	Indet
Rio Ouro Preto RESEX	angelim-manteiga	Indet	Indet
Rio Ouro Preto RESEX	angelim-melancia	Indet	Indet
Rio Ouro Preto RESEX	angelim-pedra	Fabaceae	Indet
Rio Ouro Preto RESEX	angelim-rosa	Indet	Indet
Rio Ouro Preto RESEX	angelim-saia	Indet	Indet
Rio Ouro Preto RESEX	acariquara	Olacaceae	Minquartia sp.
Rio Ouro Preto RESEX	araparí	Fabaceae	Piptadenia sp.
Rio Ouro Preto RESEX	babaçu	Arecaceae	Attalea speciosa
Rio Ouro Preto RESEX	babaçu-do-mato	Arecaceae	Attalea speciosa
Rio Ouro Preto RESEX	bacaba	Arecaceae	Oenocarpus balickii
Rio Ouro Preto RESEX	bacabinha	Arecaceae	Oenocarpus sp.
Rio Ouro Preto RESEX	bacuparí	Indet	Indet
Rio Ouro Preto RESEX	bacurí	Clusiaceae	Platonia insignis
Rio Ouro Preto RESEX	bacurí-coroa	Indet	Indet
Rio Ouro Preto RESEX	bacurí-de-anta	Clusiaceae	Platonia insignis
Rio Ouro Preto RESEX	bacurí-liso	Indet	Indet
Rio Ouro Preto RESEX	bacurizinho	Clusiaceae	Indet
Rio Ouro Preto RESEX	baja	Indet	Indet
Rio Ouro Preto RESEX	bandá	Indet	Indet
Rio Ouro Preto RESEX	bangué	Indet	Indet
Rio Ouro Preto RESEX	biribá	Annonaceae	Annona sp.
Rio Ouro Preto RESEX	breu	Burseraceae	Protium sp.
Rio Ouro Preto RESEX	breu-branco	Burseraceae	Protium sp.
Rio Ouro Preto RESEX	breu-lacre	Indet	Indet
Rio Ouro Preto RESEX	breu-mescla	Indet	Indet
Rio Ouro Preto RESEX	breu-vermelho	Burseraceae	Tetragastris panamensis
Rio Ouro Preto RESEX	buriti	Arecaceae	Mauritia flexuosa
Rio Ouro Preto RESEX	cacau	Malvaceae	Theobroma cacao
Rio Ouro Preto RESEX	cacau-de-macaco	Malvaceae	Theobroma speciosum
Rio Ouro Preto RESEX	cacau-do-mato	Malvaceae	Theobroma speciosum
Rio Ouro Preto RESEX	cacauí	Malvaceae	Theobroma sp.
Rio Ouro Preto RESEX	caixeta	Bignoniaceae	Tabebuia cassinoides
Rio Ouro Preto RESEX	caju	Anacardiaceae	Anacardium occidentale
Rio Ouro Preto RESEX	cajuí	Anacardiaceae	Anacardium giganteum
Rio Ouro Preto RESEX	cajuí-vermelho	Indet	Indet
Rio Ouro Preto RESEX	caraipé	Indet	Indet
Rio Ouro Preto RESEX	carapanaúba	Apocynaceae	Aspidosperma sp.
Rio Ouro Preto RESEX	casca-de-açaí	Indet	Indet
Rio Ouro Preto RESEX	casca-grossa	Indet	Indet
Rio Ouro Preto RESEX	castanha	Lecythidaceae	Bertholletia excelsa
Rio Ouro Preto RESEX	castanha-da-índia	Indet	Indet
Rio Ouro Preto RESEX	castanha-vermelha	Sapotaceae	Chrysophyllum prieurii
Rio Ouro Preto RESEX	catuaba	Menispermaceae	Abuta grandifolia
Rio Ouro Preto RESEX	cauxo	Indet	Indet
Rio Ouro Preto RESEX	caximbo	Indet	Indet
Rio Ouro Preto RESEX	cedro	Meliaceae	Cedrela odorata
Rio Ouro Preto RESEX	cedro-mara	Fabaceae	Cedrelinga cateniformis
Rio Ouro Preto RESEX	cedro-rosa	Meliaceae	Cedrela odorata
Rio Ouro Preto RESEX	cinzeiro	Vochysiaceae	Qualea multiflora
Rio Ouro Preto RESEX	copaíba	Fabaceae	Copaifera sp.
Rio Ouro Preto RESEX	copaíba-angelim	Indet	Indet
Rio Ouro Preto RESEX	copaíba-baixio	Indet	Indet
Rio Ouro Preto RESEX	copaíba-jacaré	Indet	Indet
Rio Ouro Preto RESEX	copaíba-marimari	Indet	Indet
Rio Ouro Preto RESEX	cumaru-de-cheiro	Fabaceae	Amburana acreana
Rio Ouro Preto RESEX	cumaru-de-ferro	Fabaceae	Dipteryx odorata
Rio Ouro Preto RESEX	cupiúba	Goupiaceae	Goupia glabra
Rio Ouro Preto RESEX	cupuaçu	Malvaceae	Theobroma grandiflorum
Rio Ouro Preto RESEX	cupuí	Malvaceae	Theobroma subincanum
Rio Ouro Preto RESEX	dendê	Arecaceae	Indet
Rio Ouro Preto RESEX	embaúba	Urticaceae	Cecropia pachystachya
Rio Ouro Preto RESEX	envira	Annonaceae	Indet
Rio Ouro Preto RESEX	envira-amargosa	Annonaceae	Guatteria punctata
Rio Ouro Preto RESEX	envira-sangue	Indet	Indet
Rio Ouro Preto RESEX	fava	Fabaceae	Dimorphandra mollis
Rio Ouro Preto RESEX	fava-amarela	Indet	Indet
Rio Ouro Preto RESEX	fava-branca	Indet	Indet
Rio Ouro Preto RESEX	fava-igapó	Indet	Indet
Rio Ouro Preto RESEX	fava-pedra	Indet	Indet
Rio Ouro Preto RESEX	fava-terra-firme	Indet	Indet
Rio Ouro Preto RESEX	fava-vermelha	Indet	Indet
Rio Ouro Preto RESEX	frejó	Indet	Indet
Rio Ouro Preto RESEX	gameleira	Moraceae	Ficus maxima
Rio Ouro Preto RESEX	garapeira	Indet	Indet
Rio Ouro Preto RESEX	goiaba	Myrtaceae	Psidium guajava
Rio Ouro Preto RESEX	goiaba-araçá	Indet	Indet
Rio Ouro Preto RESEX	guaraná	Indet	Indet
Rio Ouro Preto RESEX	guarantã	Rutaceae	Esenbeckia leiocarpa
Rio Ouro Preto RESEX	guariúba	Moraceae	Clarisia racemosa
Rio Ouro Preto RESEX	inajá	Arecaceae	Attalea maripa
Rio Ouro Preto RESEX	ingá	Indet	Indet
Rio Ouro Preto RESEX	ingá-de-macaco	Fabaceae	Inga heterophylla
Rio Ouro Preto RESEX	ingá-do-mato	Indet	Indet
Rio Ouro Preto RESEX	ingá-do-rio	Indet	Indet
Rio Ouro Preto RESEX	pau-darco-amarelo	Bignoniaceae	Tabebuia serratifolia
Rio Ouro Preto RESEX	pau-darco-roxo	Bignoniaceae	Tabebuia impetiginosa
Rio Ouro Preto RESEX	itaúba	Lauraceae	Mezilaurus itauba
Rio Ouro Preto RESEX	jaboticaba	Indet	Indet
Rio Ouro Preto RESEX	jaci	Indet	Indet
Rio Ouro Preto RESEX	jambo	Melastomataceae	Bellucia strigosa
Rio Ouro Preto RESEX	jatobá	Fabaceae	Hymenaea courbaril
Rio Ouro Preto RESEX	jenipapo	Rubiaceae	Genipa americana; Tocoyena formosa
Rio Ouro Preto RESEX	jenipapo-manso	Rubiaceae	Genipa americana
Rio Ouro Preto RESEX	jequitibá	Indet	Indet
Rio Ouro Preto RESEX	jutaí	Fabaceae	Dialium guianense
Rio Ouro Preto RESEX	jutaí-roxinho	Indet	Indet
Rio Ouro Preto RESEX	louro	Boraginaceae	Cordia sp.
Rio Ouro Preto RESEX	louro-itaúba	Lauraceae	Mezilaurus itauba
Rio Ouro Preto RESEX	massaranduba	Sapotaceae	Manilkara elata
Rio Ouro Preto RESEX	macucu	Indet	Indet
Rio Ouro Preto RESEX	malacaixeta	Indet	Indet
Rio Ouro Preto RESEX	mamoí	Indet	Indet
Rio Ouro Preto RESEX	mandioqueiro	Vochysiaceae	Indet
Rio Ouro Preto RESEX	manga	Anacardiaceae	Mangifera indica
Rio Ouro Preto RESEX	maparajuba	Sapotaceae	Manilkara amazonica
Rio Ouro Preto RESEX	mara	Indet	Indet
Rio Ouro Preto RESEX	maracatiara	Anacardiaceae	Astronium lecointei
Rio Ouro Preto RESEX	marajá	Arecaceae	Bactris sp.
Rio Ouro Preto RESEX	maria-mole	Indet	Indet
Rio Ouro Preto RESEX	maria-preta	Sapindaceae	Diatenopteryx sp.; Zollernia paraensis
Rio Ouro Preto RESEX	marupá	Indet	Indet
Rio Ouro Preto RESEX	melancieira	Indet	Indet
Rio Ouro Preto RESEX	miratinga	Moraceae	Pseudolmedia laevis
Rio Ouro Preto RESEX	mirindiba	Combretaceae	Terminalia grandis
Rio Ouro Preto RESEX	mogno	Meliaceae	Swietenia macrophylla
Rio Ouro Preto RESEX	mulateiro	Rubiaceae	Calycophyllum spruceanum
Rio Ouro Preto RESEX	mulungu	Indet	Indet
Rio Ouro Preto RESEX	mulungu-flamengo	Indet	Indet
Rio Ouro Preto RESEX	mulungu-vermelho	Indet	Indet
Rio Ouro Preto RESEX	muruci	Indet	Indet
Rio Ouro Preto RESEX	murumuru	Arecaceae	Astrocaryum murumuru
Rio Ouro Preto RESEX	mururé	Moraceae	Brosimum sp.
Rio Ouro Preto RESEX	ouricuri	Arecaceae	Cocos coronata
Rio Ouro Preto RESEX	pacoté	Indet	Indet
Rio Ouro Preto RESEX	palheira	Indet	Indet
Rio Ouro Preto RESEX	pama	Moraceae	Pseudolmedia multinervis
Rio Ouro Preto RESEX	pama-amarela	Indet	Indet
Rio Ouro Preto RESEX	pama-amarela-grande	Indet	Indet
Rio Ouro Preto RESEX	pama-amarela-miúda	Indet	Indet
Rio Ouro Preto RESEX	pama-cabeluda	Indet	Indet
Rio Ouro Preto RESEX	pama-café	Indet	Indet
Rio Ouro Preto RESEX	pama-grande	Indet	Indet
Rio Ouro Preto RESEX	pama-mão-de-cachorro	Moraceae	Pseudolmedia macrophylla
Rio Ouro Preto RESEX	pama-mururé	Indet	Indet
Rio Ouro Preto RESEX	pama-uva	Moraceae	Pseudolmedia laevigata
Rio Ouro Preto RESEX	pama-vermelha	Indet	Indet
Rio Ouro Preto RESEX	pama-vermelha-grande	Indet	Indet
Rio Ouro Preto RESEX	pama-vermelha-miúda	Indet	Indet
Rio Ouro Preto RESEX	paracanaúba	Indet	Indet
Rio Ouro Preto RESEX	pariri	Sapotaceae	Pouteria pariry
Rio Ouro Preto RESEX	patauá	Arecaceae	Oenocarpus bataua
Rio Ouro Preto RESEX	pau-alho	Indet	Indet
Rio Ouro Preto RESEX	pau-brasil	Indet	Indet
Rio Ouro Preto RESEX	pau-gema	Indet	Indet
Rio Ouro Preto RESEX	paxiúba	Arecaceae	Socratea exorrhiza
Rio Ouro Preto RESEX	paxiubão	Arecaceae	Iriartea ventricosa
Rio Ouro Preto RESEX	paxiubinha	Arecaceae	Indet
Rio Ouro Preto RESEX	pequiarana	Indet	Indet
Rio Ouro Preto RESEX	pinheiro-cuiabano	Indet	Indet
Rio Ouro Preto RESEX	piquiá	Caryocaraceae	Caryocar villosum
Rio Ouro Preto RESEX	piranheira-branca	Indet	Indet
Rio Ouro Preto RESEX	piranheira-preta	Picrodendraceae	Piranhea trifoliolata
Rio Ouro Preto RESEX	preciosa	Lauraceae	Aniba canelilla
Rio Ouro Preto RESEX	pupunha	Arecaceae	Bactris gasipaes
Rio Ouro Preto RESEX	pupunharana	Indet	Indet
Rio Ouro Preto RESEX	quina	Apocynaceae	Geissospermum sericeum
Rio Ouro Preto RESEX	rifse	Indet	Indet
Rio Ouro Preto RESEX	ripeira	Indet	Indet
Rio Ouro Preto RESEX	roxinho	Fabaceae	Dialium guianense
Rio Ouro Preto RESEX	samaúma	Indet	Indet
Rio Ouro Preto RESEX	sarnambi	Indet	Indet
Rio Ouro Preto RESEX	seringa	Euphorbiaceae	Hevea brasiliensis
Rio Ouro Preto RESEX	seringa-itaúba	Euphorbiaceae	Hevea guianensis
Rio Ouro Preto RESEX	seringa-verdadeira	Euphorbiaceae	Hevea brasiliensis
Rio Ouro Preto RESEX	seringarana	Euphorbiaceae	Sapium sp.
Rio Ouro Preto RESEX	sorva	Apocynaceae	Couma sp.
Rio Ouro Preto RESEX	sucupira	Fabaceae	Pterodon emarginatus
Rio Ouro Preto RESEX	sucuuba	Apocynaceae	Himatanthus drasticus
Rio Ouro Preto RESEX	tachi-abacate	Indet	Indet
Rio Ouro Preto RESEX	tachi-bosta	Indet	Indet
Rio Ouro Preto RESEX	tachi-branco	Indet	Indet
Rio Ouro Preto RESEX	tachi-preto	Fabaceae	Tachigali sp.
Rio Ouro Preto RESEX	tachi-vermelho	Fabaceae	Tachigali sp.
Rio Ouro Preto RESEX	tamanqueiro	Indet	Indet
Rio Ouro Preto RESEX	tamboril	Indet	Indet
Rio Ouro Preto RESEX	taperebá	Anacardiaceae	Spondias sp.
Rio Ouro Preto RESEX	taquari	Euphorbiaceae	Mabea sp.
Rio Ouro Preto RESEX	tauarí	Lecythidaceae	Couratari pulchra
Rio Ouro Preto RESEX	tucumã	Arecaceae	Astrocaryum aculeatum
Rio Ouro Preto RESEX	tuturubá	Sapotaceae	Pouteria sp.
Rio Ouro Preto RESEX	ucuuba	Myristicaceae	Virola sp.
Rio Ouro Preto RESEX	uxi	Humiriaceae	Endopleura uchi
Rio Ouro Preto RESEX	uxi-amarelo	Humiriaceae	Endopleura uchi
Rio Ouro Preto RESEX	uxi-branco	Indet	Indet
Rio Ouro Preto RESEX	uxi-roxo	Indet	Indet
Rio Ouro Preto RESEX	uxi-vermelho	Indet	Indet
Tapajós FLONA	abacatirana	Lauraceae	Aniba burchellii
Tapajós FLONA	abiu	Sapotaceae	Pouteria caimito; Pouteria freitasii
Tapajós FLONA	abiu-vermelho	Sapotaceae	Pouteria macrophylla
Tapajós FLONA	abiurana	Sapotaceae	Pouteria macrophylla
Tapajós FLONA	açaí-solitário	Arecaceae	Euterpe precatoria
Tapajós FLONA	açaí-touceira	Arecaceae	Euterpe oleracea
Tapajós FLONA	acauã	Rubiaceae	Ferdinandusa paraensis
Tapajós FLONA	amapá	Moraceae	Brosimum utile
Tapajós FLONA	amarelão	Fabaceae	Apuleia leiocarpa
Tapajós FLONA	ananí	Clusiaceae	Symphonia globulifera
Tapajós FLONA	andiroba	Meliaceae	Carapa guyanensis
Tapajós FLONA	angelim	Fabaceae	Zygia racemosa
Tapajós FLONA	angelim-pedra	Fabaceae	Zygia racemosa
Tapajós FLONA	apuí	Moraceae	Ficus sp.
Tapajós FLONA	acariquara	Olacaceae	Minquartia guianensis
Tapajós FLONA	araçá	Myrtaceae	Eugenia patrisii
Tapajós FLONA	araracanga	Apocynaceae	Aspidosperma album; Aspidosperma desmanthum
Tapajós FLONA	atarana	Annonaceae	Duguetia sp.
Tapajós FLONA	azeitona	Myrtaceae	Syzygium cumini
Tapajós FLONA	babaçu	Arecaceae	Attalea speciosa
Tapajós FLONA	bacaba	Arecaceae	Oenocarpus bacaba; Oenocarpus distichus
Tapajós FLONA	bacabinha	Arecaceae	Oenocarpus sp.
Tapajós FLONA	bacurí	Clusiaceae	Platonia insignis; Garcinia madruno; Garcinia macrophylla
Tapajós FLONA	barbatimão	Celastraceae / Fabaceae	Maytenus guyanensis / Stryphnodendron adstringens
Tapajós FLONA	barbatimão-branco	Indet	Indet
Tapajós FLONA	barbatimão-vermelho	Indet	Indet
Tapajós FLONA	breu-branco	Burseraceae	Protium heptaphyllum
Tapajós FLONA	breu-sucuruba	Burseraceae	Protium klugii
Tapajós FLONA	buçú	Indet	Indet
Tapajós FLONA	buriti	Arecaceae	Mauritia flexuosa
Tapajós FLONA	cacau-carambola	Malvaceae	Herrania mariae
Tapajós FLONA	cacau-do-mato	Malvaceae	Theobroma speciosum
Tapajós FLONA	cacauí	Malvaceae	Herrania mariae
Tapajós FLONA	cajarana	Indet	Indet
Tapajós FLONA	cajuaçu	Anacardiaceae	Anacardium giganteum; Anacardium spruceanum
Tapajós FLONA	cajuí	Anacardiaceae	Anacardium sp.
Tapajós FLONA	canela-de-velho	Salicaceae / Melastomataceae	Casearia javitensis; Myconia sp.
Tapajós FLONA	capitiú	Siparunaceae	Siparuna guianensis
Tapajós FLONA	caraipé	Chrysobalanaceae	Licania sp.
Tapajós FLONA	caramuri	Sapotaceae	Micropholis guyanensis; Micropholis venulosa; Pouteria opposita
Tapajós FLONA	caranã	Arecaceae	Indet
Tapajós FLONA	carapanaúba	Apocynaceae	Aspidosperma oblongum
Tapajós FLONA	castanha	Lecythidaceae	Bertholletia excelsa
Tapajós FLONA	castanha-de-arara	Euphorbiaceae	Joannesia heveoides
Tapajós FLONA	castanha-sapucaia	Lecythidaceae	Lecythis sp.
Tapajós FLONA	castanhola	Indet	Indet
Tapajós FLONA	caxinguba	Moraceae	Ficus maxima; Ficus nymphaeifolia
Tapajós FLONA	cedro	Meliaceae	Cedrela odorata
Tapajós FLONA	cedro-amarelo	Indet	Indet
Tapajós FLONA	cedro-bordado	Indet	Indet
Tapajós FLONA	cedro-branco	Meliaceae	Cedrela fissilis
Tapajós FLONA	cedro-vermelho	Meliaceae	Cedrela odorata
Tapajós FLONA	cedrorana	Vochysiaceae	Vochysia obidensis
Tapajós FLONA	coco	Arecaceae	Cocos nucifera
Tapajós FLONA	copaíba	Fabaceae	Copaifera multijuga
Tapajós FLONA	coração-de-nego	Fabaceae	Chamaecrista apoucouita
Tapajós FLONA	cramuri	Sapotaceae	Chrysophyllum oppositum
Tapajós FLONA	crânio-de-macaco	Indet	Indet
Tapajós FLONA	cravo	Indet	Indet
Tapajós FLONA	cumaru	Fabaceae	Dipteryx odorata
Tapajós FLONA	cumbeira	Indet	Indet
Tapajós FLONA	cunhai	Indet	Indet
Tapajós FLONA	cupiúba	Goupiaceae	Goupia glabra
Tapajós FLONA	cupuí	Malvaceae	Theobroma sylvestre; Theobroma subincanum
Tapajós FLONA	curuá	Arecaceae	Attalea spectabilis
Tapajós FLONA	cutite	Sapotaceae	Pouteria filipes
Tapajós FLONA	embaúba	Urticaceae	Cecropia sp.
Tapajós FLONA	embaúba-branca	Urticaceae	Cecropia palmata
Tapajós FLONA	embaúba-vermelha	Urticaceae	Cecropia sciadophylla
Tapajós FLONA	envira	Annonaceae	Indet
Tapajós FLONA	envira-preta	Annonaceae	Annona exsucca; Guatteria megalophylla; Duguetia pycnastera
Tapajós FLONA	escorrega-macaco	Rubiaceae	Semaphyllanthe megistocaula
Tapajós FLONA	farinha-seca	Achariaceae / Melastomataceae / Ulmaceae	Lindackeria paraensis / Miconia mirabilis / Ampelocera edentula
Tapajós FLONA	fava	Fabaceae	Stryphnodendron coriaceum
Tapajós FLONA	fava-amarela	Fabaceae	Vataireopsis speciosa; Pithecellobium amplissimum
Tapajós FLONA	fava-amargosa	Fabaceae	Indet
Tapajós FLONA	fava-bolacha	Fabaceae	Pseudopiptadenia cf. suaveolens
Tapajós FLONA	fava-branca	Fabaceae	Pseudopiptadenia cf. suaveolens
Tapajós FLONA	fava-caracachá	Indet	Indet
Tapajós FLONA	fava-cordão-de-são-francisco	Indet	Indet
Tapajós FLONA	fava-orelha-de-macaco	Fabaceae	Enterolobium schomburgkii
Tapajós FLONA	fava-orelha-de-nego	Fabaceae	Pseudopiptadenia cf. suaveolens
Tapajós FLONA	fava-roxa	Indet	Indet
Tapajós FLONA	fava-tapete	Indet	Indet
Tapajós FLONA	fruta-amarela	Indet	Indet
Tapajós FLONA	garapeira	Fabaceae	Apuleia leiocarpa
Tapajós FLONA	goiaba	Myrtaceae	Psidium guajava
Tapajós FLONA	guaruba	Vochysiaceae	Erisma uncinatum
Tapajós FLONA	gumbeira	Indet	Indet
Tapajós FLONA	inajá	Arecaceae	Attalea maripa
Tapajós FLONA	ingá	Fabaceae	Inga alba; Inga cayennensis; Inga brachystachys
Tapajós FLONA	ingá-peludo	Fabaceae	Inga grandiflora
Tapajós FLONA	ingá-xixica	Fabaceae	Inga gracilifolia
Tapajós FLONA	pau-darco-amarelo	Bignoniaceae	Handroanthus serratifolius
Tapajós FLONA	pau-darco-mijão	Bignoniaceae	Handroanthus serratifolius
Tapajós FLONA	pau-darco-roxo	Lamiaceae	Vitex triflora
Tapajós FLONA	itaúba	Lauraceae	Mezilaurus itauba
Tapajós FLONA	itaúba-amarela	Lauraceae	Mezilaurus itauba
Tapajós FLONA	itaúba-preta	Lauraceae	Mezilaurus itauba
Tapajós FLONA	itaúba-vermelha	Lauraceae	Mezilaurus itauba
Tapajós FLONA	jacarana	Indet	Indet
Tapajós FLONA	jacarandá	Fabaceae	Dalbergia spruceana
Tapajós FLONA	jacareuba	Calophyllaceae	Calophyllum brasiliense
Tapajós FLONA	jacitara	Indet	Indet
Tapajós FLONA	jará	Arecaceae	Leopoldinia pulchra
Tapajós FLONA	jará-do-mato	Indet	Indet
Tapajós FLONA	jarana	Lecythidaceae	Lecythis lurida
Tapajós FLONA	jarana-branca	Lecythidaceae	Lecythis prancei
Tapajós FLONA	jarana-vermelha	Indet	Indet
Tapajós FLONA	jatobá	Fabaceae	Hymenaea courbaril
Tapajós FLONA	jauarí	Arecaceae	Astrocaryum jauari
Tapajós FLONA	jutaí	Fabaceae	Hymenaea parvifolia
Tapajós FLONA	lacre-branco	Hypericaceae	Vismia guianensis
Tapajós FLONA	lacre-vermelho	Hypericaceae	Vismia guianensis
Tapajós FLONA	louro	Lauraceae	Ocotea cujumary; Ocotea nitida cf.; Licaria martiniana
Tapajós FLONA	louro-bosta	Lauraceae	Licaria martiniana
Tapajós FLONA	louro-fava	Lauraceae	Ocotea oblonga; Clavija cf. lancifolia
Tapajós FLONA	louro-itaúba	Lauraceae	Licaria martiniana
Tapajós FLONA	louro-pedra	Indet	Indet
Tapajós FLONA	louro-preto	Lauraceae	Ocotea cujumary; Ocotea nitida
Tapajós FLONA	louro-rosa	Lauraceae	Ocotea percurrens; Licaria armeniaca
Tapajós FLONA	macacaúba	Fabaceae	Platymiscium sp.; Platymiscium filipes; Platymiscium trinitatis
Tapajós FLONA	massaranduba	Sapotaceae	Manilkara elata
Tapajós FLONA	mamoí	Caricaceae	Jacaratia spinosa
Tapajós FLONA	manga	Anacardiaceae	Mangifera indica
Tapajós FLONA	maracatiara	Anacardiaceae	Astronium lecointei
Tapajós FLONA	maracatiara-amarela	Anacardiaceae	Astronium lecointei
Tapajós FLONA	maracatiara-preta	Anacardiaceae	Astronium lecointei
Tapajós FLONA	marajá	Arecaceae	Bactris maraja
Tapajós FLONA	marfim	Opiliaceae	Agonandra brasiliensis
Tapajós FLONA	marupá	Simaroubaceae	Simarouba amara
Tapajós FLONA	matamatá	Lecythidaceae	Indet
Tapajós FLONA	melancieira	Fabaceae	Alexa grandiflora
Tapajós FLONA	merí	Humiriaceae	Humiria balsamifera
Tapajós FLONA	mirajussara	Indet	Indet
Tapajós FLONA	mirapixuna	Fabaceae	Chamaecrista apoucouita
Tapajós FLONA	miratinga	Indet	Indet
Tapajós FLONA	mirindiba	Combretaceae	Terminalia amazonia
Tapajós FLONA	mogno	Meliaceae	Swietenia macrophylla
Tapajós FLONA	molongó	Apocynaceae	Ambelania acida
Tapajós FLONA	morototó	Araliaceae	Schefflera morototoni
Tapajós FLONA	morrão	Lecythidaceae	Eschweilera collina; Eschweilera pedicellata
Tapajós FLONA	morrão-branco	Lecythidaceae	Eschweilera ovata; Eschweilera pedicellata
Tapajós FLONA	morrão-vermelho	Lecythidaceae	Indet
Tapajós FLONA	mucajá	Arecaceae	Acrocomia aculeata
Tapajós FLONA	muirapixuna	Fabaceae	Chamaecrista apoucouita
Tapajós FLONA	mumbaca	Arecaceae	Astrocaryum gynacanthum
Tapajós FLONA	munguba	Malvaceae	Pachira insignis
Tapajós FLONA	murapixí	Euphorbiaceae	Glycydendron amazonicum
Tapajós FLONA	muruci	Malpighiaceae	Byrsonima crassifolia
Tapajós FLONA	mururé	Moraceae	Brosimum acutifolium
Tapajós FLONA	muuba	Melastomataceae	Miconia phanerostila
Tapajós FLONA	ouricuri	Indet	Indet
Tapajós FLONA	pajurá	Chrysobalanaceae	Couepia bracteosa
Tapajós FLONA	para-para	Bignoniaceae	Jacaranda copaia
Tapajós FLONA	paracutaca	Fabaceae	Swartzia acuminata
Tapajós FLONA	paricá	Fabaceae	Parkia multijuga
Tapajós FLONA	passarinheira	Salicaceae	Casearia grandiflora; Casearia decandra; Trema micranthum
Tapajós FLONA	patauá	Arecaceae	Oenocarpus bataua
Tapajós FLONA	pau-para-tudo	Simaroubaceae	Simaba cedron
Tapajós FLONA	pau-rosa	Lauraceae	Phyllostemonodaphne geminiflora
Tapajós FLONA	paxiúba	Arecaceae	Iriartella setigera
Tapajós FLONA	picuiarana	Indet	Indet
Tapajós FLONA	piquiá	Caryocaraceae	Caryocar villosum
Tapajós FLONA	piquiarana	Caryocaraceae	Indet
Tapajós FLONA	pirauxi	Indet	Indet
Tapajós FLONA	piririma	Arecaceae	Syagrus cocoides
Tapajós FLONA	pitomba	Sapindaceae	Talisia marleneana
Tapajós FLONA	pororoca	Fabaceae	Dialium guianense
Tapajós FLONA	preciosa	Lauraceae	Aniba canelilla
Tapajós FLONA	pupunha	Arecaceae	Bactris gasipaes
Tapajós FLONA	quina	Apocynaceae	Geissospermum reticulatum
Tapajós FLONA	roxinho	Fabaceae	Peltogyne venosa
Tapajós FLONA	saboneteira	Sapindaceae	Sapindus saponaria
Tapajós FLONA	saboneteira-preta	Sapindaceae	Sapindus saponaria
Tapajós FLONA	saboneteira-vermelha	Indet	Indet
Tapajós FLONA	sacaca	Euphorbiaceae	Croton cajucara
Tapajós FLONA	samaúma	Malvaceae	Ceiba pentandra
Tapajós FLONA	seringa	Euphorbiaceae	Hevea brasiliensis
Tapajós FLONA	sorva	Apocynaceae	Couma sp.
Tapajós FLONA	sucupira	Fabaceae	Indet
Tapajós FLONA	sucuuba	Apocynaceae	Himatanthus articulatus; Himatanthus drasticus
Tapajós FLONA	surucucurana	Annonaceae	Duguetia sp.
Tapajós FLONA	tachi	Fabaceae	Tachigali eriopetala; Tachigali micropetala
Tapajós FLONA	tachi-branco	Fabaceae	Tachigali eriopetala; Tachigali micropetala
Tapajós FLONA	tachi-vermelho	Fabaceae	Tachigali eriopetala; Tachigali micropetala
Tapajós FLONA	taperebá	Anacardiaceae	Spondias mombin
Tapajós FLONA	tapiririca	Anacardiaceae	Tapirira guianensis
Tapajós FLONA	taquari	Euphorbiaceae	Mabea angustifolia; Mabea speciosa
Tapajós FLONA	taquarirana	Indet	Indet
Tapajós FLONA	tatajuba	Moraceae	Bagassa guianensis
Tapajós FLONA	tauarí	Lecythidaceae	Couratari stellata
Tapajós FLONA	tento-amarelo	Fabaceae	Ormosia excelsa
Tapajós FLONA	tento-branco-e-preto	Indet	Indet
Tapajós FLONA	tento-flamengo	Indet	Indet
Tapajós FLONA	tento-vermelho	Fabaceae	Ormosia stipularis
Tapajós FLONA	timbaúba	Fabaceae	Pseudopiptadenia cf. suaveolens
Tapajós FLONA	timborana	Fabaceae	Pseudopiptadenia psilostachya
Tapajós FLONA	tucumã-açu	Arecaceae	Astrocaryum aculeatum
Tapajós FLONA	tucumã-casado	Indet	Indet
Tapajós FLONA	tucumã-piranga	Indet	Indet
Tapajós FLONA	tucumãí	Arecaceae	Astrocaryum acaule
Tapajós FLONA	ucuuba	Myristicaceae	Virola venosa
Tapajós FLONA	unha-de-gato	Rutaceae	Zanthoxylum fagara
Tapajós FLONA	uxi	Humiriaceae	Endopleura uchi
Tapajós FLONA	uxi-amarelo	Humiriaceae	Endopleura uchi
Tapajós FLONA	uxi-curuba	Indet	Indet
Tapajós FLONA	uxi-de-morcego	Indet	Indet
Tapajós FLONA	verônica	Connaraceae	Connarus perrottetii
Tapajós FLONA	marapuama	Rhabdodendraceae / Primulaceae	Rhabdodendron amazonicum / Clavija tarapotana
Tapajós FLONA	virola	Indet	Indet
Tapirapé-Aquiri FLONA	açaí-jussara	Arecaceae	Euterpe edulis
Tapirapé-Aquiri FLONA	açaí-jussara	Arecaceae	Euterpe edulis
Tapirapé-Aquiri FLONA	açaí-solitário	Arecaceae	Euterpe precatoria
Tapirapé-Aquiri FLONA	amarelão	Fabaceae	Apuleia leiocarpa
Tapirapé-Aquiri FLONA	andiroba	Meliaceae	Carapa guyanensis
Tapirapé-Aquiri FLONA	angelim-pedra	Fabaceae	Hymenolobium excelsum; Hymenolobium sp.
Tapirapé-Aquiri FLONA	aroeira	Anacardiaceae	Astronium urundeuva
Tapirapé-Aquiri FLONA	ata-meju	Annonaceae	Duguetia megalocarpa
Tapirapé-Aquiri FLONA	babaçu	Arecaceae	Attalea speciosa
Tapirapé-Aquiri FLONA	bacaba	Arecaceae	Oenocarpus distichus
Tapirapé-Aquiri FLONA	bacurí	Clusiaceae	Garcinia brasiliensis
Tapirapé-Aquiri FLONA	barriguda	Malvaceae	Ceiba pentandra
Tapirapé-Aquiri FLONA	boca-boa	Combretaceae	Buchenavia tomentosa
Tapirapé-Aquiri FLONA	bucheira	Indet	Indet
Tapirapé-Aquiri FLONA	burangica	Combretaceae	Buchenavia parvifolia
Tapirapé-Aquiri FLONA	burdão	Fabaceae	Samanea tubulosa
Tapirapé-Aquiri FLONA	buriti	Arecaceae	Mauritia flexuosa
Tapirapé-Aquiri FLONA	buritirana	Arecaceae	Mauritiella armata
Tapirapé-Aquiri FLONA	cacau-do-mato	Malvaceae	Theobroma speciosum
Tapirapé-Aquiri FLONA	cacau-manso	Malvaceae	Theobroma speciosum
Tapirapé-Aquiri FLONA	caju	Anacardiaceae	Anacardium giganteum; Anacardium occidentale
Tapirapé-Aquiri FLONA	canduru	Fabaceae	Myrocarpus frondosus
Tapirapé-Aquiri FLONA	canela	Lauraceae	Aniba canelilla
Tapirapé-Aquiri FLONA	canela-planta	Lauraceae	Cinnamomum verum
Tapirapé-Aquiri FLONA	carnaúba	Arecaceae	Copernicia prunifera
Tapirapé-Aquiri FLONA	castanha	Lecythidaceae	Bertholletia excelsa
Tapirapé-Aquiri FLONA	cedro	Meliaceae	Cedrela odorata
Tapirapé-Aquiri FLONA	cedrorana	Fabaceae	Cedrelinga cateniformis
Tapirapé-Aquiri FLONA	chichá	Malvaceae	Sterculia apetala
Tapirapé-Aquiri FLONA	copaíba	Fabaceae	Copaifera duckei; Copaifera martii
Tapirapé-Aquiri FLONA	coração-de-nego	Fabaceae	Swartzia laurifolia
Tapirapé-Aquiri FLONA	cumaru	Fabaceae	Dipteryx odorata
Tapirapé-Aquiri FLONA	cupuaçu	Malvaceae	Theobroma grandiflorum
Tapirapé-Aquiri FLONA	dendê	Arecaceae	Elaeis guineensis
Tapirapé-Aquiri FLONA	embaúba	Urticaceae	Cecropia sp.
Tapirapé-Aquiri FLONA	estoupeiro	Lecythidaceae	Couratari stellata
Tapirapé-Aquiri FLONA	favão	Fabaceae	Parkia multijuga
Tapirapé-Aquiri FLONA	feijão-brabo	Capparaceae	Cynophalla flexuosa
Tapirapé-Aquiri FLONA	frutão	Sapotaceae	Pouteria pariry
Tapirapé-Aquiri FLONA	frutinha	Indet	Indet
Tapirapé-Aquiri FLONA	gameleira	Moraceae	Ficus gomelleira; Ficus sp.
Tapirapé-Aquiri FLONA	guarantã	Rutaceae	Esenbeckia grandiflora
Tapirapé-Aquiri FLONA	gueroba	Arecaceae	Syagrus sp.
Tapirapé-Aquiri FLONA	gueroba-mansa	Arecaceae	Syagrus sp.
Tapirapé-Aquiri FLONA	inajá	Arecaceae	Attalea maripa
Tapirapé-Aquiri FLONA	inajazinho	Indet	Indet
Tapirapé-Aquiri FLONA	ingá	Fabaceae	Inga sp.
Tapirapé-Aquiri FLONA	inharé-vermelho	Moraceae	Brosimum gaudichaudii
Tapirapé-Aquiri FLONA	pau-darco-amarelo	Bignoniaceae	Handroanthus serratifolius
Tapirapé-Aquiri FLONA	pau-darco-branco	Bignoniaceae	Tabebuia roseoalba
Tapirapé-Aquiri FLONA	pau-darco-roxo	Bignoniaceae	Handroanthus impetiginosus
Tapirapé-Aquiri FLONA	itaúba	Lauraceae	Mezilaurus itauba; Mezilaurus duckei; Mezilaurus lindaviana
Tapirapé-Aquiri FLONA	jambo	Melastomataceae / Myrtaceae	Bellucia grossularioides / Syzygium malaccense
Tapirapé-Aquiri FLONA	jangada	Malvaceae	Apeiba tibourbou
Tapirapé-Aquiri FLONA	jatobá	Fabaceae	Hymenaea courbaril
Tapirapé-Aquiri FLONA	jenipapo	Rubiaceae	Genipa americana
Tapirapé-Aquiri FLONA	jucá	Fabaceae	Libidibia ferrea
Tapirapé-Aquiri FLONA	linheira	Combretaceae	Buchenavia congesta
Tapirapé-Aquiri FLONA	macaúba	Arecaceae	Indet
Tapirapé-Aquiri FLONA	massaranduba	Indet	Indet
Tapirapé-Aquiri FLONA	mamoí	Caricaceae	Jacaratia spinosa
Tapirapé-Aquiri FLONA	maracatiara	Anacardiaceae	Astronium lecointei
Tapirapé-Aquiri FLONA	matamatá	Lecythidaceae	Eschweilera sp.
Tapirapé-Aquiri FLONA	mogno	Meliaceae	Swietenia macrophylla
Tapirapé-Aquiri FLONA	moreira	Moraceae	Maclura tinctoria
Tapirapé-Aquiri FLONA	mucuíba	Indet	Indet
Tapirapé-Aquiri FLONA	mumbaca	Arecaceae	Astrocaryum gynacanthum
Tapirapé-Aquiri FLONA	muruci	Malpighiaceae	Byrsonima crispa; Byrsonima stipulacea; Byrsonima chrysophylla; Byrsonima crassifolia
Tapirapé-Aquiri FLONA	mururé	Moraceae	Brosimum acutifolium
Tapirapé-Aquiri FLONA	orelha-de-macaco	Fabaceae	Enterolobium schomburgkii
Tapirapé-Aquiri FLONA	paqueira	Malvaceae	Pachira aquatica
Tapirapé-Aquiri FLONA	pau-para-tudo	Simaroubaceae	Simaba cedron
Tapirapé-Aquiri FLONA	pau-piranha	Picrodendraceae	Piranhea trifoliolata
Tapirapé-Aquiri FLONA	pau-preto	Fabaceae	Cenostigma tocantinum
Tapirapé-Aquiri FLONA	pau-santo	Fabaceae	Zollernia ilicifolia
Tapirapé-Aquiri FLONA	paxiúba	Arecaceae	Socratea exorrhiza
Tapirapé-Aquiri FLONA	paxiubão	Arecaceae	Iriartea deltoidea
Tapirapé-Aquiri FLONA	paxiubinha	Arecaceae	Iriartella setigera
Tapirapé-Aquiri FLONA	piquiá	Caryocaraceae	Caryocar villosum
Tapirapé-Aquiri FLONA	piroqueira	Fabaceae / Moraceae	Swartzia leptopetala / Castilla ulei
Tapirapé-Aquiri FLONA	pitomba	Sapindaceae	Talisia esculenta
Tapirapé-Aquiri FLONA	quina	Apocynaceae / Ochnaceae	Geissospermum argenteum / Quiina amazonica; Quiina paraensis
Tapirapé-Aquiri FLONA	rosquinha	Fabaceae	Chloroleucon acacioides
Tapirapé-Aquiri FLONA	sangra-d'água	Euphorbiaceae	Croton urucurana
Tapirapé-Aquiri FLONA	sapucaia	Lecythidaceae	Lecythis pisonis
Tapirapé-Aquiri FLONA	seringa	Indet	Indet
Tapirapé-Aquiri FLONA	tamboril	Fabaceae	Enterolobium maximum
Tapirapé-Aquiri FLONA	taperebá	Anacardiaceae	Spondias mombin
Tapirapé-Aquiri FLONA	taquari	Euphorbiaceae	Mabea fistulifera
Tapirapé-Aquiri FLONA	tatajuba	Moraceae	Bagassa guianensis
Tapirapé-Aquiri FLONA	tataruba	Sapotaceae	Pouteria macrophylla
Tapirapé-Aquiri FLONA	tucumã	Arecaceae	Astrocaryum aculeatum
Tapirapé-Aquiri FLONA	tucumã-piranga	Arecaceae	Astrocaryum vulgare
Tapirapé-Aquiri FLONA	ubim	Arecaceae	Geonoma aspidiifolia
Tapirapé-Aquiri FLONA	urucum	Bixaceae	Bixa orellana
Tapirapé-Aquiri FLONA	uxi	Humiriaceae	Endopleura uchi
Tefé FLONA	abacatão	Indet	Indet
Tefé FLONA	abacatirana	Lauraceae	Ocotea nitida
Tefé FLONA	abacatirana-preta	Indet	Indet
Tefé FLONA	abiu	Sapotaceae	Pouteria caimito
Tefé FLONA	abiurana	Sapotaceae	Indet
Tefé FLONA	abiurana-amarela	Achariaceae	Lindackeria paludosa
Tefé FLONA	abiurana-branca	Sapotaceae	Pouteria anibifolia
Tefé FLONA	abiurana-ferro	Sapotaceae	Pouteria guianensis
Tefé FLONA	abiurana-grande	Rubiaceae	Kutchubaea cf. insignis
Tefé FLONA	abiurana-lisa	Indet	Indet
Tefé FLONA	abiurana-miúda	Sapotaceae	Micropholis cf. mensalis
Tefé FLONA	abiurana-peluda	Indet	Indet
Tefé FLONA	açaí-solitário	Arecaceae	Euterpe precatoria
Tefé FLONA	açaí-touceira	Arecaceae	Euterpe oleracea
Tefé FLONA	acapú	Indet	Indet
Tefé FLONA	acariquara	Apocynaceae	Geissospermum urceolatum
Tefé FLONA	amapá	Indet	Indet
Tefé FLONA	amarelinho	Fabaceae	Clathrotropis macrocarpa
Tefé FLONA	ananí	Moraceae	Helianthostylis sprucei
Tefé FLONA	anaxi	Indet	Indet
Tefé FLONA	andiroba	Meliaceae	Carapa guyanensis
Tefé FLONA	angelim	Fabaceae	Andira unifoliolata
Tefé FLONA	angelim-branco	Indet	Indet
Tefé FLONA	angelim-pedra	Fabaceae	Hymenolobium petraeum
Tefé FLONA	angelim-vermelho	Fabaceae	Dinizia excelsa
Tefé FLONA	anil	Melastomataceae	Miconia myriantha
Tefé FLONA	anoirá	Chrysobalanaceae	Licania macrophylla
Tefé FLONA	apuí	Clusiaceae	Clusia insignis
Tefé FLONA	apuruí	Rubiaceae	Indet
Tefé FLONA	araparí	Fabaceae	Macrolobium acaciifolium
Tefé FLONA	araparirana	Fabaceae	cf. Macrolobium gracile
Tefé FLONA	arara-tucupi	Fabaceae / Euphorbiaceae	Parkia nitida / Sagotia brachysepala
Tefé FLONA	ata	Indet	Indet
Tefé FLONA	azeitona	Indet	Indet
Tefé FLONA	babaçu	Arecaceae	Attalea speciosa
Tefé FLONA	bacaba	Arecaceae	Oenocarpus bacaba
Tefé FLONA	bacabinha	Arecaceae	Oenocarpus sp.
Tefé FLONA	bacurí	Indet	Indet
Tefé FLONA	bacurí-de-anta	Indet	Indet
Tefé FLONA	beira-igarapé	Indet	Indet
Tefé FLONA	breu	Burseraceae	Dacryodes chimantensis
Tefé FLONA	buriti	Arecaceae	Mauritia flexuosa
Tefé FLONA	buritirana	Arecaceae	Mauritiella aculeata
Tefé FLONA	cabeça-de-arara	Moraceae	Naucleopsis macrophylla
Tefé FLONA	cabeça-de-macaco	Indet	Indet
Tefé FLONA	cacau	Malvaceae	Theobroma cacao
Tefé FLONA	cacau-azul	Malvaceae	Theobroma sylvestre
Tefé FLONA	cacau-do-mato	Indet	Indet
Tefé FLONA	cacaurana	Malvaceae	Theobroma speciosum
Tefé FLONA	caioé	Indet	Indet
Tefé FLONA	cajuaçu	Anacardiaceae	Anacardium spruceanum
Tefé FLONA	cajuí	Anacardiaceae	Anacardium sp.
Tefé FLONA	cajurana	Sapotaceae	Pouteria aff. Elegans
Tefé FLONA	camandá-açu	Indet	Indet
Tefé FLONA	camu-camu	Myrtaceae	Myrciaria sp.
Tefé FLONA	canela-de-jacamim	Indet	Indet
Tefé FLONA	caniço	Indet	Indet
Tefé FLONA	capitari	Bignoniaceae	Handroanthus barbatus
Tefé FLONA	capurana	Indet	Indet
Tefé FLONA	caraipé	Indet	Indet
Tefé FLONA	caraipé-várzea	Indet	Indet
Tefé FLONA	caranã	Arecaceae	Indet
Tefé FLONA	carapanaúba	Apocynaceae	Aspidosperma sp.
Tefé FLONA	castanha	Lecythidaceae	Bertholletia excelsa
Tefé FLONA	castanha-de-cutia	Lecythidaceae	Couratari stellata
Tefé FLONA	castanha-sapucaia	Indet	Indet
Tefé FLONA	cauxo	Indet	Indet
Tefé FLONA	caxinguba	Indet	Indet
Tefé FLONA	cedro	Meliaceae	Cedrela odorata
Tefé FLONA	cedro-branco	Indet	Indet
Tefé FLONA	cedro-vermelho	Meliaceae	Cedrela odorata
Tefé FLONA	cedrorana	Meliaceae	Cedrela fissilis
Tefé FLONA	cedrorana-branco	Indet	Indet
Tefé FLONA	cedrorana-vermelho	Indet	Indet
Tefé FLONA	coco	Indet	Indet
Tefé FLONA	copaíba	Fabaceae	Copaifera sp.
Tefé FLONA	cuaçu	Indet	Indet
Tefé FLONA	cuia	Indet	Indet
Tefé FLONA	cumaru	Fabaceae	Dipteryx odorata
Tefé FLONA	cumaté	Myrtaceae	Myrcia atramentifera
Tefé FLONA	cupiúba	Goupiaceae	Goupia glabra
Tefé FLONA	cupuaçu	Malvaceae	Theobroma grandiflorum
Tefé FLONA	cupuí	Malvaceae	Theobroma subincanum
Tefé FLONA	dendê	Arecaceae	Indet
Tefé FLONA	envira-branca	Annonaceae	Bocageopsis pleiosperma
Tefé FLONA	envira-murteira	Indet	Indet
Tefé FLONA	envira-preta	Annonaceae	Indet
Tefé FLONA	envira-surucucu	Annonaceae	Oxandra xylopioides
Tefé FLONA	fruta-de-jabuti	Indet	Indet
Tefé FLONA	fruta-preta	Indet	Indet
Tefé FLONA	fruta-vermelha	Indet	Indet
Tefé FLONA	fruto-verde	Indet	Indet
Tefé FLONA	garapeira	Indet	Indet
Tefé FLONA	garrote	Moraceae	Brosimum rubescens
Tefé FLONA	jitó	Chrysobalanaceae	Licania sp.
Tefé FLONA	goiaba-de-anta	Melastomataceae	Bellucia grossularioides
Tefé FLONA	graviola	Indet	Indet
Tefé FLONA	guariúba	Moraceae	Indet
Tefé FLONA	inajá	Arecaceae	Attalea maripa
Tefé FLONA	ingá	Fabaceae	Inga sp.
Tefé FLONA	ingá-açu	Fabaceae	Inga sp.
Tefé FLONA	ingá-de-macaco	Fabaceae	Inga sp.
Tefé FLONA	ingá-do-mato	Fabaceae	Inga sp.
Tefé FLONA	ingá-quadrada	Fabaceae	Inga sp.
Tefé FLONA	ingaí	Burseraceae	Protium cf. heptaphyllum
Tefé FLONA	itaúba	Indet	Indet
Tefé FLONA	itaúba-amarela	Lauraceae	Mezilaurus itauba
Tefé FLONA	itaúba-preta	Lauraceae	Ocotea splendens
Tefé FLONA	jacareuba	Calophyllaceae	Calophyllum brasiliense
Tefé FLONA	jaci	Arecaceae	Indet
Tefé FLONA	jacitara	Arecaceae	Indet
Tefé FLONA	jatobá	Fabaceae	Hymenaea sp.
Tefé FLONA	jauarí	Arecaceae	Astrocaryum jauari
Tefé FLONA	jenipapo	Rubiaceae	Genipa americana
Tefé FLONA	joão-mole	Nyctaginaceae	Indet
Tefé FLONA	jauarí	Arecaceae	Indet
Tefé FLONA	jupati	Indet	Indet
Tefé FLONA	jutaí	Fabaceae	Hymenaea parvifolia
Tefé FLONA	lacre	Hypericaceae	Vismia japurensis
Tefé FLONA	louro	Lauraceae	Indet
Tefé FLONA	louro-abacate	Lauraceae	Ocotea tabacifolia
Tefé FLONA	louro-aritú	Lauraceae	Licaria chrysophylla
Tefé FLONA	louro-bosta	Lauraceae	Indet
Tefé FLONA	louro-chumbo	Lauraceae	Pleurothyrium vasquezii
Tefé FLONA	louro-coxurí	Lauraceae	Indet
Tefé FLONA	louro-da-capoeira	Lauraceae	Ocotea cf. cinerea
Tefé FLONA	louro-itaúba	Lauraceae	Mezilaurus itauba
Tefé FLONA	louro-inamuí	Lauraceae	Indet
Tefé FLONA	louro-preto	Lauraceae	Ocotea aciphylla
Tefé FLONA	macacaúba	Fabaceae	Platymiscium sp.
Tefé FLONA	massaranduba	Sapotaceae	Manilkara elata
Tefé FLONA	macucu	Euphorbiaceae	Sandwithia guyanensis
Tefé FLONA	macucurana	Chrysobalanaceae	Hirtella hebeclada
Tefé FLONA	mangarataia	Indet	Indet
Tefé FLONA	marupá	Simaroubaceae	Simarouba amara
Tefé FLONA	matamatá	Lecythidaceae	Eschweilera coriacea
Tefé FLONA	maúba	Indet	Indet
Tefé FLONA	miratoá	Indet	Indet
Tefé FLONA	miratoá-amarelo	Indet	Indet
Tefé FLONA	miratoá-roxo	Indet	Indet
Tefé FLONA	moela-de-mutum	Quiinaceae	Lacunaria jenmanii
Tefé FLONA	molongó	Apocynaceae	Indet
Tefé FLONA	mulateiro	Fabaceae	Peltogyne paniculata
Tefé FLONA	murapiranga	Indet	Indet
Tefé FLONA	murumuru	Arecaceae	Astrocaryum murumuru
Tefé FLONA	muruxi	Indet	Indet
Tefé FLONA	mututi	Fabaceae	Pterocarpus officinalis
Tefé FLONA	ouricuri	Arecaceae	Indet
Tefé FLONA	paina	Indet	Indet
Tefé FLONA	pajurá	Indet	Indet
Tefé FLONA	palheira	Arecaceae	Indet
Tefé FLONA	paracanaúba	Indet	Indet
Tefé FLONA	paracutaca	Indet	Indet
Tefé FLONA	patauá	Arecaceae	Oenocarpus bataua
Tefé FLONA	pau-brasil	Indet	Indet
Tefé FLONA	pau-cheiroso	Indet	Indet
Tefé FLONA	pau-darco	Indet	Indet
Tefé FLONA	pau-rosa	Lauraceae	Indet
Tefé FLONA	paxiúba	Arecaceae	Indet
Tefé FLONA	paxiubão	Arecaceae	Iriartea deltoidea
Tefé FLONA	paxiubinha	Arecaceae	Indet
Tefé FLONA	pé-de-jaboti	Annonaceae	Duguetia stenantha
Tefé FLONA	pepino-do-mato	Apocynaceae	Ambelania sp.
Tefé FLONA	perereca	Anacardiaceae	Tapirira retusa
Tefé FLONA	pinhão	Indet	Indet
Tefé FLONA	pinta-cuia	Indet	Indet
Tefé FLONA	piquiá	Caryocaraceae	Caryocar villosum
Tefé FLONA	pirum	Myristicaceae	Iryanthera cf. hostmannii
Tefé FLONA	pirum-branco	Indet	Indet
Tefé FLONA	pirum-vermelho	Indet	Indet
Tefé FLONA	pitomba	Indet	Indet
Tefé FLONA	pracuuba	Fabaceae	Indet
Tefé FLONA	preciosa	Indet	Indet
Tefé FLONA	punã	Myristicaceae	Iryanthera tricornis
Tefé FLONA	pupunha	Arecaceae	Bactris gasipaes
Tefé FLONA	pupunha-planta	Arecaceae	Bactris gasipaes
Tefé FLONA	pupunharana	Indet	Indet
Tefé FLONA	purumã	Indet	Indet
Tefé FLONA	puxuri	Indet	Indet
Tefé FLONA	saboneteira	Indet	Indet
Tefé FLONA	samaúma	Indet	Indet
Tefé FLONA	samaúma	Malvaceae	Ceiba pentandra
Tefé FLONA	sardinheira	Indet	Indet
Tefé FLONA	sebinho	Indet	Indet
Tefé FLONA	seringa-barriguda	Euphorbiaceae	Hevea spruceana
Tefé FLONA	seringa-itaúba	Euphorbiaceae	Hevea guianensis
Tefé FLONA	seringa-real	Indet	Indet
Tefé FLONA	seringa-várzea	Indet	Indet
Tefé FLONA	sororoca	Indet	Indet
Tefé FLONA	sorva	Apocynaceae	Couma macrocarpa
Tefé FLONA	sorvinha	Apocynaceae	Indet
Tefé FLONA	sucupira	Fabaceae	Andira micrantha
Tefé FLONA	sucuuba	Apocynaceae	Indet
Tefé FLONA	tachi	Fabaceae	Tachigali paniculata
Tefé FLONA	tachi-branco	Indet	Indet
Tefé FLONA	tachi-vermelho	Indet	Indet
Tefé FLONA	tanimbuca	Combretaceae	Buchenavia oxycarpa
Tefé FLONA	tanimbuca-amarela	Combretaceae	Terminalia parvifolia
Tefé FLONA	tanimbuca-preta	Indet	Indet
Tefé FLONA	taperebá	Anacardiaceae	Spondias sp.
Tefé FLONA	tariri	Picramniaceae	Picramnia ciliata
Tefé FLONA	tauarí	Lecythidaceae	Cariniana integrifolia
Tefé FLONA	tento	Fabaceae	Ormosia cf. coccinea
Tefé FLONA	tento-branco	Indet	Indet
Tefé FLONA	tento-preto	Indet	Indet
Tefé FLONA	tento-roxo	Indet	Indet
Tefé FLONA	tento-vermelho	Fabaceae	Ormosia stipularis
Tefé FLONA	tucumã	Arecaceae	Astrocaryum aculeatum
Tefé FLONA	tucumã-piranga	Indet	Indet
Tefé FLONA	tucumãí	Indet	Indet
Tefé FLONA	ubim	Arecaceae	Indet
Tefé FLONA	ubim-branco	Arecaceae	Indet
Tefé FLONA	ubim-preto	Arecaceae	Indet
Tefé FLONA	ucuuba	Myristicaceae	Virola calophylla
Tefé FLONA	ucuubão	Indet	Indet
Tefé FLONA	umari	Indet	Indet
Tefé FLONA	umari-branco	Indet	Indet
Tefé FLONA	umari-cujubi-amarelo	Indet	Indet
Tefé FLONA	umari-cujubi-branca	Indet	Indet
Tefé FLONA	umari-preto	Indet	Indet
Tefé FLONA	unha-de-gato	Rutaceae	Zanthoxylum fagara
Tefé FLONA	urucum	Indet	Indet
Tefé FLONA	uxi	Humiriaceae	Endopleura uchi
Tefé FLONA	violeta	Myristicaceae	Virola calophylla
Tefé FLONA	xixuá	Celastraceae	Indet
Uatumã RDS	abiu	Sapotaceae	Pouteria caimito
Uatumã RDS	abiu-do-mato	Sapotaceae	Pouteria sp.
Uatumã RDS	abiurana	Sapotaceae	Indet
Uatumã RDS	açaí-solitário	Arecaceae	Euterpe precatoria
Uatumã RDS	acapurana	Fabaceae	Campsiandra comosa
Uatumã RDS	acariquara	Olacaceae	Minquartia guianensis
Uatumã RDS	amapá	Moraceae	Brosimum parinarioides
Uatumã RDS	andiroba	Meliaceae	Carapa sp.
Uatumã RDS	angelim	Fabaceae	Indet
Uatumã RDS	angelim-bordado	Fabaceae	cf. Zygia racemosa
Uatumã RDS	angelim-campina	Fabaceae	Hymenolobium modestum
Uatumã RDS	angelim-fava	Fabaceae	Parkia sp.
Uatumã RDS	angelim-jacaré	Indet	Indet
Uatumã RDS	angelim-pedra	Fabaceae	Dinizia excelsa
Uatumã RDS	arara-tucupi	Fabaceae	Parkia sp.
Uatumã RDS	arurá	Myristicaceae	Iryanthera cf. paraensis
Uatumã RDS	assacu	Fabaceae	Hura crepitans
Uatumã RDS	babaçu	Arecaceae	Attalea speciosa
Uatumã RDS	bacaba	Arecaceae	Oenocarpus bacaba
Uatumã RDS	balata	Sapotaceae	Indet
Uatumã RDS	breu	Burseraceae	Protium sp.
Uatumã RDS	breu-vermelho	Burseraceae	Protium sp.
Uatumã RDS	buriti	Arecaceae	Mauritia flexuosa
Uatumã RDS	caferana	Indet	Indet
Uatumã RDS	cajuaçu	Anacardiaceae	Anacardium sp.
Uatumã RDS	caramuri	Sapotaceae	Micropholis sp.
Uatumã RDS	caramuri-roxo	Sapotaceae	Micropholis sp.
Uatumã RDS	caranã	Arecaceae	Mauritia carana
Uatumã RDS	caranaí	Arecaceae	Mauritiella aculeata
Uatumã RDS	carapanaúba	Apocynaceae	Aspidosperma sp.
Uatumã RDS	carnaúba	Arecaceae	Copernicia prunifera
Uatumã RDS	castanha	Lecythidaceae	Bertholletia excelsa
Uatumã RDS	cedrinho	Malvaceae	Scleronema micranthum
Uatumã RDS	cedrinho-branco	Malvaceae	Scleronema micranthum
Uatumã RDS	cedrinho-vermelho	Indet	Indet
Uatumã RDS	cedro	Meliaceae	Cedrela odorata
Uatumã RDS	cedrorana	Fabaceae	Cedrelinga cateniformis
Uatumã RDS	copaíba	Fabaceae	Copaifera multijuga
Uatumã RDS	cumaru	Fabaceae	Dipteryx odorata
Uatumã RDS	cumaté	Myrtaceae	Myrcia atramentifera
Uatumã RDS	cupiúba	Goupiaceae	Goupia glabra
Uatumã RDS	envira-cutia	Annonaceae	Indet
Uatumã RDS	fava-igapó	Fabaceae	Vatairea guianensis
Uatumã RDS	fava-terra-firme	Fabaceae	Indet
Uatumã RDS	goiaba-de-anta	Melastomataceae	Bellucia grossularioides; Bellucia dichotoma
Uatumã RDS	inajá	Arecaceae	Attalea maripa
Uatumã RDS	pau-darco-amarelo	Bignoniaceae	Handroanthus serratifolius
Uatumã RDS	itaúba	Lauraceae	Mezilaurus itauba
Uatumã RDS	jaboticaba	Myrtaceae	Myrciaria sp.
Uatumã RDS	jabuti	Indet	Indet
Uatumã RDS	jarana	Lecythidaceae	Lecythis sp.
Uatumã RDS	jatobá	Fabaceae	Hymenaea sp.
Uatumã RDS	joão-mole	Nyctaginaceae	Indet
Uatumã RDS	jauarí	Arecaceae	Astrocaryum jauari
Uatumã RDS	louro-aguano	Indet	Indet
Uatumã RDS	louro-aritú	Lauraceae	Licaria cf. chrysophylla
Uatumã RDS	louro-cheiroso	Lauraceae	Indet
Uatumã RDS	louro-chumbo	Lauraceae	Indet
Uatumã RDS	louro-da-vázea	Lauraceae	Nectandra amazonum
Uatumã RDS	louro-do-igapó	Lauraceae	Nectandra amazonum
Uatumã RDS	louro-embaúba	Indet	Indet
Uatumã RDS	louro-espinho	Indet	Indet
Uatumã RDS	louro-gamela	Lauraceae	Sextonia rubra
Uatumã RDS	louro-inamuí	Lauraceae	Ocotea cymbarum
Uatumã RDS	louro-itaúba	Lauraceae	Mezilaurus itauba
Uatumã RDS	louro-paxiúba	Indet	Indet
Uatumã RDS	louro-pimenta	Lauraceae	Ocotea canaliculata
Uatumã RDS	louro-preto	Lauraceae	Licaria cannella
Uatumã RDS	louro-puxurí	Lauraceae	Licaria puchury-major
Uatumã RDS	louro-rosa	Lauraceae	Aniba rosodora
Uatumã RDS	louro-touceira	Indet	Indet
Uatumã RDS	massaranduba	Sapotaceae	Manilkara sp.
Uatumã RDS	maracatiara	Anacardiaceae	Astronium lecointei
Uatumã RDS	marupá	Simaroubaceae	Simarouba amara
Uatumã RDS	matamatá	Lecythidaceae	Eschweilera sp.
Uatumã RDS	melancieira	Indet	Indet
Uatumã RDS	mogno	Meliaceae	Swietenia macrophylla
Uatumã RDS	molongó	Apocynaceae	Malouetia cf. tamaquarina
Uatumã RDS	mulateiro	Rubiaceae	Capirona decorticans
Uatumã RDS	mumbaca	Arecaceae	Astrocaryum gynacanthum
Uatumã RDS	muruci	Malpighiaceae	Byrsonima cf. chrysophylla
Uatumã RDS	murumuru	Arecaceae	Astrocaryum sp.
Uatumã RDS	olho-de-pombo	Indet	Indet
Uatumã RDS	paracutaca	Fabaceae	Swartzia polyphylla
Uatumã RDS	patauá	Arecaceae	Oenocarpus bataua
Uatumã RDS	pau-darco-branco	Bignoniaceae	Handroanthus sp.
Uatumã RDS	pau-darco-roxo	Bignoniaceae	Handroanthus sp.; Jacaranda copaia
Uatumã RDS	pau-doce	Sapotaceae	Pradosia schomburgkiana
Uatumã RDS	piquiá	Caryocaraceae	Caryocar villosum
Uatumã RDS	piririma	Arecaceae	Syagrus cocoides
Uatumã RDS	pitomba	Sapindaceae	Talisia esculenta
Uatumã RDS	roxinho	Fabaceae	Peltogyne sp.
Uatumã RDS	saboneteira	Fabaceae	Abarema jupunba
Uatumã RDS	sapateira	Clusiaceae	Tovomita sp.
Uatumã RDS	sapucaia	Lecythidaceae	Lecythis sp.
Uatumã RDS	seringa	Euphorbiaceae	Hevea sp.
Uatumã RDS	seringa-barriguda	Euphorbiaceae	Hevea spruceana
Uatumã RDS	sorva	Apocynaceae	Couma utilis
Uatumã RDS	sucupira	Fabaceae	Indet
Uatumã RDS	sucuuba	Apocynaceae	Himatanthus sp.
Uatumã RDS	tachi	Fabaceae	Tachigali sp.
Uatumã RDS	taquari	Euphorbiaceae	Mabea sp.
Uatumã RDS	tarumã	Lamiaceae	Vitex cymosa
Uatumã RDS	tauarí	Lecythidaceae	Cariniana micrantha
Uatumã RDS	tento	Fabaceae	Ormosia cf. excelsa
Uatumã RDS	tento-flamengo	Fabaceae	Ormosia sp.
Uatumã RDS	tento-igapó	Fabaceae	Ormosia cf. excelsa
Uatumã RDS	tintarana	Melastomataceae	Miconia regelii
Uatumã RDS	tinteira	Melastomataceae	Miconia regelii
Uatumã RDS	tucumã	Arecaceae	Astrocaryum aculeatum
Uatumã RDS	ubim	Arecaceae	Geonoma sp.
Uatumã RDS	umari	Metteniusaceae	Poraqueiba sericea
Uatumã RDS	uxi	Humiriaceae	Endopleura uchi
Uatumã RDS	uxi-coroa	Humiriaceae	Duckesia verrucosa
Uatumã RDS	uxirana	Chrysobalanaceae	Couepia paraensis
Uatumã RDS	violeta	Fabaceae	Peltogyne sp.
Uatumã RDS	virola	Myristicaceae	Virola sp.

## Sheet: Metadata
Correspondence of popular and scientific names based on official management plans and local studies that have both names. We also identified some species in the field.
The references we used are listed below:
Bezerra, M.d.G.F., and Cardoso, A.L.d.R. (2012). "Plano de Manejo da Floresta Nacional de Caxiuanã", in: Anexo 8. Socioeconomia: Subsídios do componente socioeconômico para a elaboração do Plano de Manejo da Floresta Nacional de Caxiuanã. (Brasília: Instituto Chico Mendes de Conservação da Biodiversidade).
Cordeiro, A. (2004). "Floresta Nacional do Tapajós: Plano de manejo". (Belterra: IBAMA).
Ferreira, L.V., Silva, A.S.L., and Almeida, S.S.d. (2012). "Plano de Manejo da Floresta Nacional de Caxiuanã", in: Anexo 6. Vegetação: Diagnóstico da Vegetação da Floresta Nacional de Caxiuanã. (Brasília: Instituto Chico Mendes de Conservação da Biodiversidade).
Ferreira, M.J., Levis, C., Iriarte, J., and Clement, C.R. (2019). Legacies of intensive management in forests around pre-columbian and modern settlements in the Madeira-Tapajós interfluve, Amazonia. Acta Botanica Brasilica 33(2), 9. doi: 10.1590/0102-33062018abb0339.
ICMBio. (2014a). "Plano de Manejo da Floresta Nacional de Tefé". (Brasília).
ICMBio. (2014b). "Plano de Manejo: Reserva Extrativista do Rio Ouro Preto / RO". (Brasília).
ICMBio. (2018). "Plano de Manejo da Floresta Nacional de Humaitá – AM ". (Belo Horizonte).
IPi. (2010). "Plano de gestão da Reserva de Desenvolvimento Sustentável Piagaçu-Purus". (Beruri, Anori,Tapauá e Coari).
Levis, C., Peña-Claros, M., Clement, C.R., Costa, F.R.C., Alves, R.P., Ferreira, M.J., et al. (2020). Pre-Columbian soil fertilization and current management maintain food resource availability in old-growth Amazonian forests. Plant Soil 450(1), 20. doi: 10.1007/s11104-020-04461-z.
Machado, C.d.C. (2018). Conhecimento e consumo de plantas alimentícias em cinco comunidades da Reserva de Desenvolvimento Sustentável Piagaçu-Purus, Amazonas. Master's degree, Instituto Nacional de Pesquisas da Amazônia.
Machado, K.S.d.S. (2009). Estrutura e composição florística de uma floresta de terra firme na Reserva de Desenvolvimento Sustentável Amanã, Amazônia Central. Master's degree, Instituto Nacional de Pesquisas da Amazônia.
Matos, C.B. (2015). Diversidade e usos de quintais agroflorestais da comunidade São Domingos, Floresta Nacional do Tapajós, Belterra - PA. Master's degree, Universidade Federal do Oeste do Pará.
Medeiros, T.K.A.d. (2018). Conhecimento ecológico e manejo de produtos florestais não-madeireiros por comunidades tradicionais da Amazônia. Master's degree, Universidade Federal Rural do semi-árido.
Oliveira, A.G.d. (2017). Levantamento Etnobotânico de plantas medicinais na Reserva Extrativista Rio Ouro Preto. Undergraduate in Environmental Management, Fundação Universidade Federal de Rondônia.
Schmidt, M.J. (2003). Farming and Patterns of Agrobiodiversity on the Amazon Floodplain in the vicinity of Mamirauá, Amazonas, Brazil. Master's degree, University of Florida.
SEMA. and IDSM. (2019). "Plano de gestão da Reserva de Desenvolvimento Sustentável Amanã", in: Série Técnica Planos de Gestão. (Tefé).
